# Supplementary material for: Distinct gene signatures in aortic tissue from ApoE-/- mice exposed to pathogens or Western diet
Source: PubMed Central journal article supplement (PMC4367889; doi:10.1186/1471-2164-15-1176), 2014-12-24
Supplement: 12864_2014_6916_MOESM4_ESM.pdf [file 12864_2014_6916_MOESM4_ESM.pdf]

**Supplemental Table 2 - Gene Set Enrichment Analysis.** Positive enrichment: chronic *P. gingivalis*-treated group vs. chronic control group

| <b>Gene Set</b>                                                                                                              | <b>Genes Contributing to Core Enrichment</b>                                                                                                                                                                                                                                                                                                                                                                                                                                                                                                                                                                       |
|------------------------------------------------------------------------------------------------------------------------------|--------------------------------------------------------------------------------------------------------------------------------------------------------------------------------------------------------------------------------------------------------------------------------------------------------------------------------------------------------------------------------------------------------------------------------------------------------------------------------------------------------------------------------------------------------------------------------------------------------------------|
| <b>1 BASAL CELL CARCINOMA</b>                                                                                                | Trp53, Dvl2, Gli3, Wnt5b, Smo, Ctnnb1, Fzd1, Fzd6, Tcf7, Sufu, Fzd8, Ptch2, Gli1, Fzd5, Ptch1, Wnt16, Gli2, Wnt5a, Hhip, Tcf7l1, Wnt9a, Tcf7l2, Fzd2, Bmp4, Fzd7                                                                                                                                                                                                                                                                                                                                                                                                                                                   |
| <b>3 NUCLEACHROMOSOME PART</b>                                                                                               | H2afy, Cbx1, H1fnt, Pura, Syce1, Syce2, Ercc4, Atrx, Ube2i, Tipin, Pola1, Cbx5, 1110036O03Rik, Foxc1, H2afy2                                                                                                                                                                                                                                                                                                                                                                                                                                                                                                       |
| <b>5 REGULATION OF GENE EXPRESSION EPIGENETIC</b>                                                                            | Gpx1, Crebzf, Dmap1, Tnp1, H2afy, Dnmt1, Dicer1, Hmga1, Dgcr8, Rag1ap1, Smarcd1, Atf7ip, Atrx, Dnmt3a, Glmn, H2afy2                                                                                                                                                                                                                                                                                                                                                                                                                                                                                                |
| <b>6 KEGG MELANOGENESIS</b>                                                                                                  | Mc1r, Dvl2, Camk2d, A, Wnt5b, Creb3l4, Ctnnb1, Fzd1, Gnai2, Adcy5, Fzd6, Tcf7, Gnaq, Creb3l2, Creb3l1, Plcb3, Fzd8, Adcy7, Mapk3, Fzd5, Wnt16, Adcy3, Prkacb, Plcb1, Gnai3, Wnt5a, Gnai1, Tcf7l1, Camk2b, Plcb4, Wnt9a, Camk2g, Tcf7l2, Fzd2, Fzd7                                                                                                                                                                                                                                                                                                                                                                 |
| <b>8 DNA REPLICATION</b><br>2 DNA DEPENDENT DNA REPLICATION<br>11 REGULATION OF DNA REPLICATION                              | <sup>2</sup> Orc2l, Rev1, <sup>2</sup> Orc5l, <sup>2</sup> Pura, <sup>2,11</sup> Enpp7, <sup>2</sup> Rev3l, Pole3, Pot1a, <sup>2</sup> Msh2, Terf2, <sup>2,11</sup> Cdt1, <sup>2</sup> Msh6, Nae1, <sup>2</sup> Mlh1, <sup>2,11</sup> Nbn, <sup>2</sup> Polg2, Pold4, Terf2ip, <sup>2</sup> Rfc1, Rad50, <sup>2,11</sup> Ccdc88a, Nap1l1, Pole2, <sup>2</sup> Prim2, <sup>2,11</sup> S100a11, <sup>2,11</sup> Gli1, <sup>2</sup> Pms2, <sup>2,11</sup> Gli2, Ptms, <sup>2,11</sup> Tipin, <sup>2</sup> Pola1, <sup>2</sup> Abl1, <sup>2</sup> Mutyh, <sup>2</sup> Orc4l, <sup>2</sup> Prim1                        |
| <b>9 PROTEINACEOUS EXTRACELLULAR MATRIX</b><br>4 EXTRACELLULAR MATRIX PART<br>7 BASEMENT MEMBRANE<br>13 EXTRACELLULAR MATRIX | <sup>4,7</sup> Fbn1, <sup>4</sup> Col5a1, <sup>4,7</sup> Col4a3, Adamts5, <sup>4,7</sup> Lama4, <sup>4,7</sup> Col4a4, Prelp, <sup>4</sup> Col18a1, <sup>4,7</sup> Smc3, <sup>4,7</sup> Lamb2, <sup>4</sup> Col5a2, <sup>4</sup> Tnxb, <sup>4,7</sup> Magee1, Ltbp4, <sup>4,7</sup> Aplp1, <sup>4,7</sup> Agrn, <sup>4</sup> Col6a3, <sup>4</sup> Col3a1, <sup>4</sup> Col1a2, <sup>4</sup> Col15a1, <sup>4,7</sup> Efemp2, <sup>4,7</sup> Sntb2, Fbln5, Optc, Postn, <sup>4,7</sup> Sgce, Mmp11, Ecm2, <sup>4,7</sup> Dmd, <sup>4,7</sup> Sgcd, <sup>4,7</sup> Sntg2, <sup>4,7</sup> Sntb1, <sup>4,7</sup> Col4a5 |
| <b>10 KEGG HEDGEHOG SIGNALING PATHWAY</b>                                                                                    | Gas1, Csnk1g3, Ihh, Gsk3b, Rab23, Gli3, Wnt5b, Smo, Csnk1a1, Csnk1g1, Sufu, Fbxw11, Ptch2, Gli1, Ptch1, Wnt16, Gli2, Prkacb, Wnt5a, Hhip, Wnt9a, Bmp4                                                                                                                                                                                                                                                                                                                                                                                                                                                              |
| <b>12 REACTOME CELL EXTRACELLULAR MATRIX INTERACTIONS</b>                                                                    | Vasp, Fermt2, Itgb1, Parva, Lims2, Flna, Actn1, Rsu1, Fblim1, Ilk                                                                                                                                                                                                                                                                                                                                                                                                                                                                                                                                                  |
| <b>14 REACTOME E2F MEDIATED REGULATION OF DNA REPLICATION</b>                                                                | Dhfr, Orc2l, Orc5l, Ccna1, Cdc25a, Cdt1, Fbxo5, Pou5f1, Rrm2, Prim2, Tk2, Pola1, Orc4l, Prim1                                                                                                                                                                                                                                                                                                                                                                                                                                                                                                                      |
| <b>15 REACTOME APOPTOTIC EXECUTION PHASE</b>                                                                                 | Bcap31, Hist1h1c, Add1, 2610018G03Rik, H1f0, Vim, Dbnl, Ctnnb1, Casp3, Prkcd, Casp8, Dsg3, Pak2, Hist1h1b, Stk24, Hist1h1a, Dsg1b, Lmna, Tjp2, Rock1, Hist1h1e                                                                                                                                                                                                                                                                                                                                                                                                                                                     |
| <b>16 COLLAGEN</b>                                                                                                           | Col11a1, Col13a1, Col16a1, Col10a1, Lum, Col7a1, Col9a2, Col9a1, Col5a1, Col4a3, Col4a4, Col18a1, Col5a2, Tnxb, Col6a3, Col3a1, Col1a2, Col15a1, Col4a5                                                                                                                                                                                                                                                                                                                                                                                                                                                            |
| <b>17 REACTOME INACTIVATION OF APC VIA DIRECT INHIBITION OF THE AP COMPLEX</b>                                               | Anapc2, Cdc26, Bub3, Cdc27, Anapc5, Cdc16, Cdc23, Mad2l1, Anapc7, Anapc4                                                                                                                                                                                                                                                                                                                                                                                                                                                                                                                                           |
| <b>19 REACTOME SMOOTH MUSCLE</b>                                                                                             | Acta2, Myl12b, Myl6b, Itgb5, Myl6, Mylk, Tln1, Itga1, Myh11, Lmod1, Tpm2, Vcl                                                                                                                                                                                                                                                                                                                                                                                                                                                                                                                                      |

|                                                                                          |                                                                                                                                                                                                                                                                                                                                                                                                  |
|------------------------------------------------------------------------------------------|--------------------------------------------------------------------------------------------------------------------------------------------------------------------------------------------------------------------------------------------------------------------------------------------------------------------------------------------------------------------------------------------------|
| <b>CONTRACTION</b>                                                                       |                                                                                                                                                                                                                                                                                                                                                                                                  |
| <b>20 REACTOME<br/>CONVERSION FROM<br/>APC CDC20 TO APC<br/>CD1 IN LATE<br/>ANAPHASE</b> | Cdc14a, Anapc4, Anapc7, Cdc23, Cdc16, Anapc5, Cdc27                                                                                                                                                                                                                                                                                                                                              |
| <b>21 REACTOME<br/>SIGNALING BY PDGF</b>                                                 | Pik3cb, Plg, Col5a1, Col4a3, Col4a4, Col5a2, Col6a2, Pik3r2, Ywhab, Col6a1, Mapk3, Col6a3, Col3a1, Col1a2, Src, Col6a6, Plat, Pdgfc, Pdgfd, Thbs2, Pdgfa, Col4a5, Pdgfrb                                                                                                                                                                                                                         |
| <b>22 KEGG LYSOSOME</b>                                                                  | Glb1, Lipa, Ap1s1, Abca2, Atp6v0d1, Ctsb, Idua, Ap1m2, Manba, Ap1s2, Aga, Gga3, Cd164, Ctso, Naglu, Tpp1, Ctsf, Sgsh, Fuca1, Gns, Arsg, Gm2a, Gga2, Atp6v1h, Gla, Cltc, Ap3m2, Abcb9, Ctsh, Sumf1, Cd63, Arsb, Slc17a5, Atp6v0d2, Ctsl, Ids, Ctsk, Asah1, Pla2g15, Ppt1, Hyal1, Hexb                                                                                                             |
| <b>23 MICROTUBULE<br/>CYTOSKELETON</b>                                                   | Ranbp9, Pcm1, 6330503K22Rik, Akap9, Ccna1, 1700057K13Rik, Pkd2, Clasp2, Kif3c, Abca2, Sac3d1, Ctn3, Ckap5, Npm1, Esp1, Rpgr1p1, Tubgcp3, Brca2, Cep57, Katna1, Tsga14, Crocc, Fbxo5, Stau1, Dynll1, Cdk5rap2, Smc3, Cep63, Lyst, Cdc27, Rabgap1, Cdc16, Dnali1, Kifap3, Lats1, Mid1, Mark1, Atg4c, Gas8, Tubgcp5, Bbs4, Mtap1a, Alms1, Eml2, Ppp4r2, Sass6, Eml1, Mtap1b, Arhgef2, Sept9, Mapre1 |
| <b>24 CELL DIVISION<br/>18 CYTOKINESIS</b>                                               | Pard3, Racgap1, Brca2, Tgfb2, <sup>18</sup> Anln, <sup>18</sup> Sept7, <sup>18</sup> Sept5, <sup>18</sup> Diap2, <sup>18</sup> Myh10, <sup>18</sup> Sept6                                                                                                                                                                                                                                        |
| <b>25 REACTOME CLASS B2<br/>SECRETIN FAMILY<br/>RECEPTORS</b>                            | Smo, Gngt1, Calcrl, Fzd1, Fzd6, Fzd8, Ptch2, Fzd5, Ptch1, Gng8, Wnt16, Vipr2, Wnt5a, Ramp1, Wnt9a, Gng12, Gnb4, Fzd2, Fzd7                                                                                                                                                                                                                                                                       |

The top 25 *P. gingivalis* gene sets whose member genes are predominantly upregulated with respect to the chronic control group. Column 1 includes the gene set name (bold) as provided by MSigDB and the rank of the gene set based on Normalized Enrichment Score (NES). Gene set names that are not in bold are gene sets that are redundant or partially redundant and included within larger bolded gene sets. The NES ranged from 2.32 (for Basal Cell Carcinoma, the top ranked gene set) to 1.66 (REACTOME Class B2 Secretin Family Receptors, the 25<sup>th</sup>-ranked gene set). FDR  $q$  range: 0.001-0.186. Column 2 lists those genes within the gene set that significantly contributed to the enrichment of the gene set. Genes within redundant gene sets are preceded by corresponding superscripts for the gene set to which they belong.

**Supplemental Table 3 - Gene Set Enrichment Analysis.** Negative enrichment: chronic *P. gingivalis*-treated group vs. chronic control group

| Gene Set                                                                                                                          | Genes Contributing to Core Enrichment                                                                                                                                                                                                                                                                                                                                                                                                                                                                                                                                                                                                                                                                                                                                                                                                                                                                                                                                                                                                                                                                                                                                                                                                                                                                                                                                                                                                                                                                                                                                                                                                                                                                                                                                                      |
|-----------------------------------------------------------------------------------------------------------------------------------|--------------------------------------------------------------------------------------------------------------------------------------------------------------------------------------------------------------------------------------------------------------------------------------------------------------------------------------------------------------------------------------------------------------------------------------------------------------------------------------------------------------------------------------------------------------------------------------------------------------------------------------------------------------------------------------------------------------------------------------------------------------------------------------------------------------------------------------------------------------------------------------------------------------------------------------------------------------------------------------------------------------------------------------------------------------------------------------------------------------------------------------------------------------------------------------------------------------------------------------------------------------------------------------------------------------------------------------------------------------------------------------------------------------------------------------------------------------------------------------------------------------------------------------------------------------------------------------------------------------------------------------------------------------------------------------------------------------------------------------------------------------------------------------------|
| <b>2 REACTOME<br/>INTEGRATION OF<br/>ENERGY METABOLISM</b>                                                                        | Gm12251, Adcy6, Gnao1, Pdp2, Gm5506, Ndufv3, Snap25, Gpi1, Pfkfb3, Ndufb3, Pfkfb1, Ndufa6, Gng2, Ndufb6, Ndufa13, Ndufa2, Acaca, Tpi1, Pkm2, Gck, Gng11, Prkaa2, Acly, Ndufa1, Stradb, Etfa, Ndufb2, Rapgef3, Ndufa12, Pflk, Nnt, Suclg1, Sdhc, Cox8a, Pdhx, Pfkfb2, Ndufb11, Ndufc2, Abcc8, Dld, Cox6c, Ndufs8, Ndufv2, Adcy4, Ndufa7, Ndufb7, Atp5k, Prkar2b, Acsl1, Ndufa9, Fasn, Ndufs4, Ndufa4, Atp5o, Dlst, Cox7b, Atp5j2, Atp5d, Atp5f1, Atp5j, Aldoa, Gm4943, Kcnj11, Mlxipl, Ndufb9, Sucla2, Pdk2, Cs, Uqcr2, Idh3g, Cox4i1, Slc25a4, Idh3b, Ndufs7, Etfhd, Sdhc, Uqcr10, Sdha, Ndufs6, Ndufa5, Pdk1, Slc25a20, Rapgef4, Pcx, Ndufs1, Pdha1, Dlat, Cpt2, Idh2, Ndufc1, Atp5c1, Pdha, Ndufb8, Idh3a, Atp5a1, Atp5b, Fh1, Pfk, Ndufs2, Ndufa3, Ndufa8, Etfb, Uqcrs1, Cox6b1, Ogdh, Sdhb, Ndufb5, Ndufb10, Ndufa10, Cacna2d2, Pgam2, Ndufv1, Cyc1, Uqcr1, Acacb, Eno3, Cpt1b, Aco2, Mdh2, Pdk4, Cox5a, Uqcrq                                                                                                                                                                                                                                                                                                                                                                                                                                                                                                                                                                                                                                                                                                                                                                                                                                                                         |
| <b>4 KEGG OXIDATIVE<br/>PHOSPHORYLATION</b>                                                                                       | Tcirg1, Atp6v0b, Cox4i2, Atp6v1e1, Cox6a1, Ndufs5, Ppa2, Ndufa4l2, Atp6v0a2, Atp6v1b2, Ndufv3, Cox17, Ndufb3, Ndufa6, Ndufb6, Ndufs3, Ndufa2, Ndufa1, Ndufb2, Sdhc, Cox8a, Cox7a2, Ndufa11, Ndufc2, Cox6c, Cox10, Ndufs8, Ndufv2, Ndufa7, Ndufb7, Atp5k, Ndufa9, Ndufs4, Ndufa4, Atp5o, Uqcrh, Atp5j2, Cox7b, Atp5d, Atp5f1, Atp5j, Ppa1, Ndufb9, Uqcr2, Cox4i1, Ndufs7, Sdhc, Uqcr10, Sdha, Ndufs6, Ndufa5, Atp5g3, Ndufs1, Ndufc1, Atp5c1, Ndufb8, Atp5a1, Atp5b, Ndufs2, Ndufa3, Ndufa8, Uqcrs1, Cox6b1, Sdhb, Ndufb5, Ndufb10, Ndufa10, Ndufv1, Cyc1, Uqcr1, Cox7a1, Cox6a2, Cox5a, Uqcrq                                                                                                                                                                                                                                                                                                                                                                                                                                                                                                                                                                                                                                                                                                                                                                                                                                                                                                                                                                                                                                                                                                                                                                                              |
| <b>5 KEGG PARKINSONS<br/>DISEASE</b>                                                                                              | Uba7, Ndufb3, Ndufa6, Ndufb6, Vdac2, Pink1, Ndufs3, Ndufa2, Ndufa1, Ndufb2, Sdhc, Cox8a, Cox7a2, Ndufc2, Cox6c, Ndufs8, Ube2g2, Ndufv2, Ndufa7, Ndufb7, Ndufa9, Ndufs4, Ndufa4, Atp5o, Uqcrh, Cox7b, Atp5d, Atp5f1, Atp5j, Vdac1, Ndufb9, Uqcr2, Cox4i1, Slc25a4, Ndufs7, Sdhc, Uqcr10, Sdha, Ndufs6, Ndufa5, Atp5g3, Ndufs1, Ndufc1, Atp5c1, Ndufb8, Atp5a1, Atp5b, Ndufs2, Ndufa3, Ndufa8, Uqcrs1, Cox6b1, Sdhb, Ndufb5, Ndufb10, Ndufa10, Ndufv1, Cyc1, Uqcr1, Cox7a1, Cox6a2, Cox5a, Uqcrq                                                                                                                                                                                                                                                                                                                                                                                                                                                                                                                                                                                                                                                                                                                                                                                                                                                                                                                                                                                                                                                                                                                                                                                                                                                                                             |
| <b>7 MITOCHONDRIAL PART</b>                                                                                                       | Cox15, Acn9, Mrps10, Bckdk, Mrps18c, Gatm, Mrps24, Mrpl10, Mrps15, Slc25a22, Bcs1l, Timm44, Fis1, Timm50, Pin4, Mrps28, Aifm2, Ndufa6, Mrps35, Mrps18a, Mrps12, Ndufb6, Hccs, Alas2, Vdac2, Ndufa13, Opa1, Mrpl55, Ndufs3, Ndufa2, Timm8b, Aldh4a1, Ndufa1, Supv3l1, Mrpl51, Etfa, Abcb6, Ucp3, Nfs1, Abcb8, Oxa1l, Dnaja3, Phb, Nnt, Phb2, Slc25a3, Timm10, Immt, Slc25a11, Ndufs8, Grpel1, Bckdha, Ndufa9, Ndufs4, Atp5o, Atp5d, Atp5f1, Pmpca, Atp5j, Vdac1, Cs, Mrpl12, Acadm, Rhot2, Mrpl42, Ndufs7, Sdhc, Sdha, Atp5g3, Ndufs1, Mtx2, Atp5c1, Atp5a1, Mfn2, Atp5b, Ndufs2, Etfb, Ogdh, Ndufv1, Uqcr1                                                                                                                                                                                                                                                                                                                                                                                                                                                                                                                                                                                                                                                                                                                                                                                                                                                                                                                                                                                                                                                                                                                                                                                 |
| <b>8 MITOCHONDRIAN<br/>10 MITOCHONDRIAL<br/>MEMBRANE<br/>11 MITOCHONDRIAL<br/>ENVELOPE<br/>17 MITOCHONDRIAL<br/>MEMBRANE PART</b> | Hsd17b10, Bckdk, Mrps18c, Arg2, Gatm, Gatz1, Mrps24, Mrpl10, Sco1, Ndufs5, Mrps15, Gcdh, Slc25a22, Mrps31, Spg7, Slc22a4, Oxsm, <sup>10,17</sup> Bcs1l, Polg, Timm44, <sup>10,17</sup> Fis1, Cln3, Mthfd2, Letm1, Lonp1, Fdx1, Pts, Mtch1, <sup>10,17</sup> Timm50, Pin4, Mrps28, Pccb, 0610009O20Rik, Tsfm, Mipep, Coq6, Aifm1, <sup>10,11</sup> Aifm2, <sup>10,11,17</sup> Ndufa6, Mrps35, Mrps18a, Pgs1, Bcl2l1, Mrps12, Msrp2, <sup>10,11,17</sup> Ndufb6, <sup>10,11</sup> Hccs, Ldhc, <sup>10,11</sup> Alas2, Clpx, <sup>10,11</sup> Vdac2, <sup>10,11,17</sup> Ndufa13, <sup>10,11,17</sup> Opa1, Pink1, Mrpl55, <sup>10,11,17</sup> Ndufs3, <sup>10,11,17</sup> Ndufa2, Glrx5, Diablo, CpoX, Tbrg4, 4930455C21Rik, <sup>10,11,17</sup> Timm8b, Aldh4a1, <sup>10,11,17</sup> Ndufa1, Supv3l1, Ptges2, D9Ertd402e, Mrpl51, Slc25a12, Mecr, Tmem126a, Etfa, <sup>11</sup> Abcb6, <sup>10,11</sup> Ucp3, Nfs1, <sup>11</sup> Abcb8, Acat1, Echs1, Hspe1, <sup>10,11,17</sup> Oxa1l, Tmem143, Lrpprc, Dnaja3, Ecsit, Pet112l, <sup>10,11</sup> Phb, Nt5m, Amacr, <sup>10,11,17</sup> Nnt, <sup>10,11</sup> Phb2, Suclg1, Sdhc, <sup>10,11</sup> Slc25a3, Ndufa11, Afg3l2, <sup>10,11,17</sup> Timm10, Dld, <sup>10,11</sup> Immt, Decr1, Acot2, <sup>10,11</sup> Slc25a11, <sup>10,11,17</sup> Ndufs8, Prdx5, Grpel1, Bckdha, Ghitm, Hspd1, <sup>10,11,17</sup> Ndufa9, Foxred1, <sup>10,11,17</sup> Ndufs4, Ndufa4, <sup>10,11,17</sup> Atp5o, Hint2, <sup>10,11,17</sup> Atp5d, Atp5f1, <sup>10,11</sup> Pmpca, <sup>10,11</sup> Atp5j, Coq7, <sup>10,11</sup> Vdac1, Sucla2, Cs, Bcat2, Hadh, Mrpl12, Acadm, Hspa9, Sod2, Acads, <sup>10,11,17</sup> Rhot2, Slc25a4, Idh3b, Mrpl42, <sup>10,11,17</sup> Ndufs7, Gbas, <sup>10,11</sup> Sdhc, Acadvl, <sup>10,11,17</sup> Sdha, Pdk1, |

|                                                                                                                                                                                 |                                                                                                                                                                                                                                                                                                                                                                                                                                                                                                                                                                                                                                                                                                                                                                                                                                                                                                                                                                                                                                                                                                                                                                                                                                                                                                                                                                                                                                                                                                                                                                                                                                                                                                                                                                                                                                                                                                                                                                                                                                                                                                                                                                                                                                                                                                                                                                                                                                                                                                                                                                                                                                                                                           |
|---------------------------------------------------------------------------------------------------------------------------------------------------------------------------------|-------------------------------------------------------------------------------------------------------------------------------------------------------------------------------------------------------------------------------------------------------------------------------------------------------------------------------------------------------------------------------------------------------------------------------------------------------------------------------------------------------------------------------------------------------------------------------------------------------------------------------------------------------------------------------------------------------------------------------------------------------------------------------------------------------------------------------------------------------------------------------------------------------------------------------------------------------------------------------------------------------------------------------------------------------------------------------------------------------------------------------------------------------------------------------------------------------------------------------------------------------------------------------------------------------------------------------------------------------------------------------------------------------------------------------------------------------------------------------------------------------------------------------------------------------------------------------------------------------------------------------------------------------------------------------------------------------------------------------------------------------------------------------------------------------------------------------------------------------------------------------------------------------------------------------------------------------------------------------------------------------------------------------------------------------------------------------------------------------------------------------------------------------------------------------------------------------------------------------------------------------------------------------------------------------------------------------------------------------------------------------------------------------------------------------------------------------------------------------------------------------------------------------------------------------------------------------------------------------------------------------------------------------------------------------------------|
|                                                                                                                                                                                 | Pcx, Chchd3, <sup>10,11,17</sup> Atp5g3, <sup>10,11,17</sup> Ndufs1, Pdha1, <sup>10,11</sup> Mtx2, Trak1, Idh2, Slc25a13, <sup>10,11,17</sup> Atp5c1, <sup>10,11,17</sup> Atp5a1, Me3, <sup>10,11,17</sup> Mfn2, <sup>10,11,17</sup> Atp5b, Fh1, <sup>10,11,17</sup> Ndufs2, Ndufa8, Etfb, <sup>10,11</sup> Ogdh, Sdhb, <sup>10,11,17</sup> Ndufv1, Cyc1, <sup>10,11,17</sup> Uqcrc1, Cox7a1, Cisd1, Cpt1b, Aco2, Pdk4, Ckmt2, 8430408G22Rik                                                                                                                                                                                                                                                                                                                                                                                                                                                                                                                                                                                                                                                                                                                                                                                                                                                                                                                                                                                                                                                                                                                                                                                                                                                                                                                                                                                                                                                                                                                                                                                                                                                                                                                                                                                                                                                                                                                                                                                                                                                                                                                                                                                                                                              |
| <b>9 KEGG CITRATE CYCLE TCA CYCLE</b>                                                                                                                                           | Mdh1, Idh2, Ogdh1, Sdhc, Fh1, Sdhc, Cs, Idh3b, Ogdh, Mdh2, Pdha1, Sdhb, Sdha, Dlat, Dlst, Dld, Idh3a, Idh3g, Sucla2, Pdhb, Suclg1, Aco2, Pck1, Pcx, Acly                                                                                                                                                                                                                                                                                                                                                                                                                                                                                                                                                                                                                                                                                                                                                                                                                                                                                                                                                                                                                                                                                                                                                                                                                                                                                                                                                                                                                                                                                                                                                                                                                                                                                                                                                                                                                                                                                                                                                                                                                                                                                                                                                                                                                                                                                                                                                                                                                                                                                                                                  |
| <b>12 KEGG ALZHEIMERS DISEASE</b>                                                                                                                                               | Ndufv3, Itpr3, Ppp3cc, Ndufb3, Ndufa6, Il1b, Ndufb6, Ndufs3, Ndufa2, Ndufa1, Ndufb2, Sdhc, Cox8a, Cox7a2, Ndufc2, Atf6, Cox6c, Ndufs8, Ndufv2, Ndufa7, Ndufb7, Itpr2, Ndufa9, Ndufs4, Ndufa4, Ryr3, Atp5o, Uqcrh, Cox7b, Atp5d, Atp5f1, Atp5j, Ndufb9, Uqcrc2, Cox4i1, Ndufs7, Sdhc, Uqcr10, Sdha, Ndufs6, Ndufa5, Atp5g3, Ndufs1, Ndufc1, Atp5c1, Ndufb8, Atp5a1, Atp5b, Ndufs2, Ndufa3, Atp2a2, Ndufa8, Uqcrc1, Cox6b1, Sdhb, Ndufb5, Ndufb10, Ndufa10, Ndufv1, Cyc1, Uqcrc1, Cox7a1, Cox6a2, Cox5a, Uqcrc1, Lpl                                                                                                                                                                                                                                                                                                                                                                                                                                                                                                                                                                                                                                                                                                                                                                                                                                                                                                                                                                                                                                                                                                                                                                                                                                                                                                                                                                                                                                                                                                                                                                                                                                                                                                                                                                                                                                                                                                                                                                                                                                                                                                                                                                        |
| <b>13 ORGANELLE INNER MEMBRANE</b><br>16 MITOCHONDRIAL INNER MEMBRANE                                                                                                           | <sup>16</sup> Timm50, <sup>16</sup> Ndufa6, <sup>16</sup> Ndufb6, <sup>16</sup> Hccs, <sup>16</sup> Alas2, <sup>16</sup> Ndufa13, <sup>16</sup> Opa1, <sup>16</sup> Ndufs3, <sup>16</sup> Ndufa2, Narf, <sup>16</sup> Timm8b, <sup>16</sup> Ndufa1, <sup>16</sup> Ucp3, <sup>16</sup> Oxa1l, <sup>16</sup> Phb, <sup>16</sup> Nnt, <sup>16</sup> Phb2, <sup>16</sup> Slc25a3, <sup>16</sup> Timm10, <sup>16</sup> Immt, <sup>16</sup> Slc25a11, <sup>16</sup> Ndufs8, <sup>16</sup> Ndufa9, <sup>16</sup> Ndufs4, <sup>16</sup> Atp5o, <sup>16</sup> Atp5d, <sup>16</sup> Pmpca, <sup>16</sup> Atp5j, <sup>16</sup> Ndufs7, <sup>16</sup> Sdhc, <sup>16</sup> Sdha, <sup>16</sup> Atp5g3, <sup>16</sup> Ndufs1, <sup>16</sup> Atp5c1, <sup>16</sup> Atp5a1, <sup>16</sup> Atp5b, <sup>16</sup> Ndufs2, <sup>16</sup> Ndufv1, <sup>16</sup> Uqcrc1                                                                                                                                                                                                                                                                                                                                                                                                                                                                                                                                                                                                                                                                                                                                                                                                                                                                                                                                                                                                                                                                                                                                                                                                                                                                                                                                                                                                                                                                                                                                                                                                                                                                                                                                                                                                                                         |
| <b>14 KEGG HUNTINGTONS DISEASE</b>                                                                                                                                              | Ndufb3, Ndufa6, Ndufb6, Vdac2, Ndufs3, Ndufa2, Ucp1, Ndufa1, Polr2e, Ndufb2, Sdhc, Cox8a, Cox7a2, Ndufc2, Cox6c, Ndufs8, Ndufv2, Pparg, Ndufa7, Ndufb7, Ndufa9, Ndufs4, Ndufa4, Atp5o, Uqcrh, Cox7b, Atp5d, Atp5f1, Atp5j, Vdac1, Ndufb9, Sod2, Uqcrc2, Cox4i1, Slc25a4, Ndufs7, Sdhc, Uqcr10, Sdha, Ndufs6, Ndufa5, Atp5g3, Ndufs1, Ndufc1, Atp5c1, Ndufb8, Atp5a1, Atp5b, Ndufs2, Ndufa3, Ndufa8, Uqcrc1, Cox6b1, Sdhb, Ndufb5, Ndufb10, Ndufa10, Ndufv1, Cyc1, Ppargc1a, Uqcrc1, Cox7a1, Cox6a2, Cox5a, Uqcrc1                                                                                                                                                                                                                                                                                                                                                                                                                                                                                                                                                                                                                                                                                                                                                                                                                                                                                                                                                                                                                                                                                                                                                                                                                                                                                                                                                                                                                                                                                                                                                                                                                                                                                                                                                                                                                                                                                                                                                                                                                                                                                                                                                                         |
| <b>15 REACTOME PYRUVATE METABOLISM AND TCA CYCLE</b><br>18 REACTOME CITRIC ACID CYCLE                                                                                           | Bsg, <sup>18</sup> Nnt, <sup>18</sup> Suclg1, <sup>18</sup> Sdhc, Pdhx, <sup>18</sup> Dld, <sup>18</sup> Dlst, <sup>18</sup> Sucla2, Pdk2, <sup>18</sup> Cs, Ldha, <sup>18</sup> Idh3g, Ldha, <sup>18</sup> Idh3b, <sup>18</sup> Sdhc, <sup>18</sup> Sdha, Pdk1, Pdha1, Dlat, <sup>18</sup> Idh2, Pdhb, <sup>18</sup> Idh3a, <sup>18</sup> Fh1, <sup>18</sup> Ogdh, <sup>18</sup> Sdhb, <sup>18</sup> Aco2, <sup>18</sup> Mdh2, Pdk4, Slc16a1                                                                                                                                                                                                                                                                                                                                                                                                                                                                                                                                                                                                                                                                                                                                                                                                                                                                                                                                                                                                                                                                                                                                                                                                                                                                                                                                                                                                                                                                                                                                                                                                                                                                                                                                                                                                                                                                                                                                                                                                                                                                                                                                                                                                                                             |
| <b>19 KEGG CARDIAC MUSCLE CONTRACTION</b>                                                                                                                                       | Cox8a, Cox7a2, Cox6c, Atp1a1, Uqcrh, Cox7b, Tnnt2, Uqcrc2, Cox4i1, Uqcr10, Tnni3, Myl2, Actc1, Atp1b1, Atp2a2, Myh6, Uqcrc1, Cox6b1, Ryr2, Cacna2d2, Cyc1, Uqcrc1, Cox7a1, Myl3, Cox6a2, Tnnc1, Cox5a, Uqcrc1, Myh7                                                                                                                                                                                                                                                                                                                                                                                                                                                                                                                                                                                                                                                                                                                                                                                                                                                                                                                                                                                                                                                                                                                                                                                                                                                                                                                                                                                                                                                                                                                                                                                                                                                                                                                                                                                                                                                                                                                                                                                                                                                                                                                                                                                                                                                                                                                                                                                                                                                                       |
| <b>20 REACTOME DIABETES PATHWAYS</b><br>1 REACTOME GLUCOSE REGULATION OF INSULIN SECRETION<br>3 REACTOME ELECTRON TRANSPORT CHAIN<br>6 REACTOME REGULATION OF INSULIN SECRETION | Dnajb11, <sup>1,6</sup> Ndufv3, <sup>1,6</sup> Snap25, <sup>6</sup> Itpr3, Hspa5, <sup>1,6</sup> Gpi1, Pappa, <sup>1,6</sup> Pfkfb3, <sup>1,3,6</sup> Ndufb3, <sup>6</sup> Gngt2, <sup>1,6</sup> Pfkfb1, <sup>1,3,6</sup> Ndufa6, <sup>6</sup> Gng2, <sup>1,3,6</sup> Ndufb6, <sup>6</sup> Glp1r, <sup>1,3,6</sup> Ndufa13, Pla2g7, Dnajb9, <sup>1,3,6</sup> Ndufs3, <sup>1,3,6</sup> Ndufa2, <sup>1,6</sup> Eno1, <sup>1,6</sup> Tpi1, Igf2, <sup>1,6</sup> Pkm2, <sup>1,6</sup> Gck, <sup>6</sup> Gng11, <sup>1,3,6</sup> Ndufa1, <sup>1,3,6</sup> Etfb, <sup>1,3,6</sup> Ndufb2, <sup>1,6</sup> Rapgef3, <sup>1,3,6</sup> Ndufa12, <sup>1,6</sup> Pfkl, <sup>1,6</sup> Nnt, <sup>1,6</sup> Suclg1, <sup>1,3,6</sup> Sdhc, <sup>1,3,6</sup> Cox8a, <sup>1,6</sup> Pdhx, <sup>1,3,6</sup> Ndufa11, <sup>1,6</sup> Pfkfb2, <sup>1,3,6</sup> Ndufb11, <sup>1,3,6</sup> Ndufc2, <sup>1,6</sup> Abcc8, Atf6, <sup>1,6</sup> Dld, <sup>1,3,6</sup> Cox6c, <sup>1,3,6</sup> Ndufs8, <sup>1,3,6</sup> Ndufv2, Herpud1, <sup>1,3,6</sup> Ndufa7, <sup>1,3,6</sup> Ndufb7, <sup>6</sup> Itpr2, <sup>1,6</sup> Atp5k, <sup>6</sup> Prkar2b, <sup>1,3,6</sup> Ndufa9, <sup>1,3,6</sup> Ndufs4, Igfbp3, <sup>1,3,6</sup> Ndufa4, <sup>1,6</sup> Atp5o, <sup>1,6</sup> Dlst, <sup>1,3,6</sup> Cox7b, <sup>1,6</sup> Atp5j2, <sup>1,6</sup> Atp5d, <sup>1,6</sup> Atp5f1, <sup>1,6</sup> Atp5j, <sup>1,6</sup> Aldoa, <sup>1,6</sup> Kcnj11, <sup>1,3,6</sup> Ndufb9, <sup>1,6</sup> Sucla2, <sup>1,6</sup> Cs, <sup>1,3,6</sup> Uqcrc2, <sup>1,6</sup> Idh3g, <sup>1,3,6</sup> Cox4i1, <sup>1,6</sup> Slc25a4, <sup>1,6</sup> Idh3b, <sup>1,3,6</sup> Ndufs7, <sup>1,3,6</sup> Etfb, <sup>1,3,6</sup> Sdhc, <sup>1,3,6</sup> Uqcr10, <sup>1,3,6</sup> Sdha, <sup>1,3,6</sup> Ndufs6, <sup>1,3,6</sup> Ndufa5, <sup>1,6</sup> Rapgef4, <sup>1,6</sup> Pcx, <sup>1,3,6</sup> Ndufs1, <sup>1,6</sup> Pdha1, <sup>1,6</sup> Dlat, <sup>1,6</sup> Idh2, <sup>1,3,6</sup> Ndufc1, <sup>1,6</sup> Atp5c1, <sup>1,6</sup> Pdha1, <sup>1,3,6</sup> Ndufb8, <sup>1,6</sup> Idh3a, <sup>1,6</sup> Atp5a1, <sup>1,6</sup> Atp5b, <sup>1,6</sup> Fh1, <sup>1,6</sup> Pfkm, <sup>1,3,6</sup> Ndufs2, <sup>1,3,6</sup> Ndufa3, <sup>1,3,6</sup> Ndufa8, <sup>1,3,6</sup> Etfb, <sup>1,3,6</sup> Uqcrc1, <sup>1,3,6</sup> Cox6b1, <sup>1,6</sup> Ogdh, <sup>1,3,6</sup> Sdhb, <sup>1,3,6</sup> Ndufb5, <sup>1,3,6</sup> Ndufb10, <sup>1,3,6</sup> Ndufa10, <sup>1,6</sup> Cacna2d2, <sup>1,6</sup> Pgam2, <sup>1,3,6</sup> Ndufv1, <sup>1,3,6</sup> Cyc1, <sup>1,3,6</sup> Uqcrc1, <sup>1,6</sup> Eno3, <sup>1,6</sup> Aco2, <sup>1,6</sup> Mdh2, <sup>1,3,6</sup> Cox5a, <sup>1,3,6</sup> Uqcrc1, <sup>6</sup> Kcng2 |
| <b>21 REACTOME GLUCOSE METABOLISM</b>                                                                                                                                           | Gpi1, Pfkfb3, Pfkfb1, Ugp2, Fbp2, Eno1, Tpi1, Pkm2, Slc25a12, Pgm2, Pygb, Gbe1, Pfkl, Gyg, Pfkfb2, Slc25a11, Agl, Pygl, Pck1, Gys1, Aldoa, Gys2, Pcx, Slc25a13, Pygm, Pfkm, Mdh1, Pgam2, Eno3, Mdh2, Got1                                                                                                                                                                                                                                                                                                                                                                                                                                                                                                                                                                                                                                                                                                                                                                                                                                                                                                                                                                                                                                                                                                                                                                                                                                                                                                                                                                                                                                                                                                                                                                                                                                                                                                                                                                                                                                                                                                                                                                                                                                                                                                                                                                                                                                                                                                                                                                                                                                                                                 |
| <b>22 ENERGY DERIVATION BY OXIDATION OF ORGANIC COMPOUNDS</b>                                                                                                                   | Gck, Gfpt2, Adrb3, Pygb, <sup>23</sup> Oxa1l, <sup>23</sup> Nnt, <sup>23</sup> Sdhc, <sup>23</sup> Ndufs4, <sup>23</sup> Uqcrc2, <sup>23</sup> Sdhc, Crat, Acadvl, Gys2, <sup>23</sup> Sdha, <sup>23</sup> Ndufs1, Pygm, <sup>23</sup> Pdha1, <sup>23</sup> Me3, <sup>23</sup> Sdhb, <sup>23</sup> Ppargc1a, <sup>23</sup> Uqcrc1, <sup>23</sup> Aco2                                                                                                                                                                                                                                                                                                                                                                                                                                                                                                                                                                                                                                                                                                                                                                                                                                                                                                                                                                                                                                                                                                                                                                                                                                                                                                                                                                                                                                                                                                                                                                                                                                                                                                                                                                                                                                                                                                                                                                                                                                                                                                                                                                                                                                                                                                                                     |

|                                           |                                                                                                                                                                                                |
|-------------------------------------------|------------------------------------------------------------------------------------------------------------------------------------------------------------------------------------------------|
| 23 CELLULAR RESPIRATION                   |                                                                                                                                                                                                |
| <b>24 REGULATION OF HEART CONTRACTION</b> | Kcnj12, Kcne1, Tnnt2, Kcnq1, Hspb7, Actc1, Chrm2, Cacna1h, Myh6, Ryr2, Scn5a, Kcng2, Des, Myh7                                                                                                 |
| <b>25 KEGG PPAR SIGNALING PATHWAY</b>     | Angptl4, Dbi, Acsl5, Acsl6, Ucp1, Fabp7, Fabp4, Slc27a1, Scp2, Plin1, Pparg, Scd1, Acsl1, Acox1, Pck1, Adipoq, Acadm, Ppara, Slc27a2, Aqp7, Cpt2, Nr1h3, Rxrg, Acadl, Cpt1b, Sorbs1, Cd36, Lpl |

The top 25 *P. gingivalis* gene sets whose member genes are predominantly downregulated with respect to the chronic control group. Column 1 includes the gene set name (bold) as provided by MSigDB and the rank of the gene set based on Normalized Enrichment Score (NES). Gene set names that are not in bold are gene sets that are redundant or partially redundant and included within larger bolded gene sets. The NES ranged from -3.24 (for REACTOME Integration of Energy Metabolism, the top ranked gene set) to -2.33 (KEGG PPAR Signaling Pathway, the 25<sup>th</sup>-ranked gene set). FDR  $q < 1 \times 10^{-30}$ . Column 2 includes those genes within the gene set that significantly contributed to the enrichment of the gene set. Genes within redundant gene sets are preceded by corresponding superscripts for the gene set to which they belong.

**Supplemental Table 4 - Gene Set Enrichment Analysis.** Positive enrichment: chronic *C. pneumoniae*-treated group vs. chronic control group

| Gene Set                                                                                                                                                                                                                                                                             | Genes Contributing to Core Enrichment                                                                                                                                                                                                                                                                                                                                                                                                                                                                                                                                                                                                                                                                                                                                                                                                                                                                                                                                                                                                                                                                             |
|--------------------------------------------------------------------------------------------------------------------------------------------------------------------------------------------------------------------------------------------------------------------------------------|-------------------------------------------------------------------------------------------------------------------------------------------------------------------------------------------------------------------------------------------------------------------------------------------------------------------------------------------------------------------------------------------------------------------------------------------------------------------------------------------------------------------------------------------------------------------------------------------------------------------------------------------------------------------------------------------------------------------------------------------------------------------------------------------------------------------------------------------------------------------------------------------------------------------------------------------------------------------------------------------------------------------------------------------------------------------------------------------------------------------|
| <b>1 MICROBODY</b><br><b>2 PEROXISOME</b><br>20 PEROXISOME ORGANIZATION AND BIOGENESIS<br>7 KEGG PROPANOATE METABOLISM                                                                                                                                                               | Gnpat, Pipox, Peci, Amacr, Ide, Ech1, Crot, <sup>20</sup> Pex12, Acot8, <sup>20</sup> Pex1, <sup>20</sup> Pex7, Acot4, Acox3, <sup>20</sup> Pex19, Pnpla8, Scp2, Acad11, Lonp2, <sup>7</sup> Mlycd, <sup>20</sup> Pex14, <sup>20</sup> Pex6, Pex11a, Hsd17b4, Pmvk, Slc25a17, Pxmp4, <sup>20</sup> Pex3, <sup>20</sup> Pex13, <sup>20</sup> Abcd3, <sup>20</sup> Pex16, Hacl1, Abcd2, Ehhadh, Slc27a2                                                                                                                                                                                                                                                                                                                                                                                                                                                                                                                                                                                                                                                                                                             |
| <b>3 KEGG PEROXISOME</b><br>12 REACTOME PEROXISOMAL LIPID METABOLISM                                                                                                                                                                                                                 | Pipox, <sup>12</sup> Acaa1a, Peci, <sup>12</sup> Amacr, Ech1, <sup>12</sup> Crot, Ddo, Pex12, <sup>12</sup> Acot8, <sup>12</sup> Abcd1, Sod1, Pex1, Pex7, <sup>12</sup> Acox3, Ephx2, Pxmp3, Pex19, Mpv17l, Abcd4, <sup>12</sup> Crat, <sup>12</sup> Scp2, Pex5, Mlycd, Acsl1, Pex14, Acsl3, <sup>12</sup> Acox1, Pex6, Pex11a, Pecr, <sup>12</sup> Hsd17b4, Nudt12, Decr2, Pmvk, <sup>12</sup> Slc25a17, Pxmp4, Pex3, Pex13, <sup>12</sup> ldh1, Dhcr4, Cat, Abcd3, Pex16, <sup>12</sup> Hacl1, Abcd2, Ehhadh, <sup>12</sup> Slc27a2, Acsl5; (Gnpat – 12 ONLY)                                                                                                                                                                                                                                                                                                                                                                                                                                                                                                                                                   |
| <b>4 KEGG PPAR SIGNALING PATHWAY</b>                                                                                                                                                                                                                                                 | Apoc3, Fabp5, Cyp27a1, Acox3, Rxra, Acadm, Slc27a1, Acadl, Scp2, Gyk, Acsl1, Cpt2, Acsl3, Acox1, Nr1h3, Ppara, Dbi, Angptl4, Aqp7, Pparg, Scd1, Fabp4, Ehhadh, Slc27a2, Me1, Ucp1, Acsl5, Plin1, Adipoq, Pck1                                                                                                                                                                                                                                                                                                                                                                                                                                                                                                                                                                                                                                                                                                                                                                                                                                                                                                     |
| <b>5 REACTOME METABOLISM OF LIPIDS AND LIPOPROTEINS</b><br>6 REACTOME REGULATION OF LIPID METABOLISM BY PEROXISOME PROLIFERATOR ACTIVATED RECEPTOR ALPHA<br>22 REACTOME CHOLESTEROL BIOSYNTHESIS<br>23 REACTOME SYNTHESIS OF BILE ACIDS AND BILE SALTS VIA 7ALPHA HYDROXYCHOLESTEROL | Crot, Cav1, Cyp46a1, Ldlr, Acat1, <sup>23</sup> Acot8, Abcd1, Apoc3, Kdsr, Tm7sf2, Scarb1, Prkaca, Hsd11b1, Echs1, <sup>23</sup> Cyp27a1, Hadha, Acox3, Sptlc1, <sup>6</sup> Abca1, <sup>6</sup> Rxra, <sup>6</sup> Acadm, <sup>6</sup> Slc27a1, Crat, Stard5, Abhd5, Acadl, Decr1, <sup>6,23</sup> Scp2, Gyk, Hadh, Prkd1, <sup>22</sup> Cyp51, <sup>23</sup> Hsd3b7, <sup>6</sup> Acsl1, Dci, <sup>6</sup> Cpt2, Acads, Agpat1, <sup>6</sup> Acox1, Sgpl1, Gpam, <sup>6</sup> Nr1h3, <sup>6</sup> Ppara, Lass2, <sup>6</sup> Pex11a, <sup>23</sup> Hsd17b4, <sup>22</sup> Dhcr7, Acadvl, <sup>22</sup> Pmvk, <sup>6</sup> Angptl4, Slc25a17, <sup>22</sup> Sqle, Agpat3, <sup>22</sup> Sc5d, <sup>22</sup> Fdft1, Idh1, <sup>6</sup> Srebf1, Slc25a20, <sup>22</sup> Lss, Acacb, <sup>6</sup> Plin2, <sup>6</sup> Scd1, Hacl1, <sup>6</sup> Fabp4, <sup>6</sup> Ehhadh, <sup>6</sup> Dgat1, <sup>22</sup> Dhcr24, <sup>23</sup> Slc27a2, <sup>6</sup> Me1, <sup>6</sup> Ucp1, Lipe, Agpat2, <sup>6</sup> Plin1, Mgl1, <sup>22</sup> Nsdhl, <sup>6</sup> Acaca, Gpd1, <sup>6</sup> Fasn, Gpd2; (Amacr – 23 ONLY) |
| <b>8 KEGG VALINE LEUCINE AND ISOLEUCINE DEGRADATION</b><br>7 KEGG PROPANOATE METABOLISM                                                                                                                                                                                              | <sup>7</sup> Acat1, <sup>7</sup> Mcee, <sup>7</sup> Echs1, Hibadh, <sup>7</sup> Hadha, Aox1, Bcat2, Acaa2, <sup>7</sup> Acadm, Dld, Mccc1, Acad8, Acadsb, <sup>7</sup> Mut, Hadh, Bckdhd, Acads, Mccc2, <sup>7</sup> Aldh6a1, <sup>7</sup> Hibch, <sup>7</sup> Aldh2, <sup>7</sup> Aldh9a1, Bckdha, <sup>7</sup> Pccb, Dbt, <sup>7</sup> Pcca, <sup>7</sup> Ehhadh, <sup>7</sup> Acat2                                                                                                                                                                                                                                                                                                                                                                                                                                                                                                                                                                                                                                                                                                                            |
| <b>9 KEGG FATTY ACID METABOLISM</b>                                                                                                                                                                                                                                                  | Aldh3a2, Acaa1a, Peci, Adh5, Acat1, Echs1, Hadha, Acox3, Acaa2, Acadm, Acadsb, Acadl, Hadh, Adh7, Acsl1, Dci, Cpt2, Acads, Acsl3, Acox1, Acadvl, Aldh2, Aldh9a1, Ehhadh, Adh1, Acat2, Acsl5                                                                                                                                                                                                                                                                                                                                                                                                                                                                                                                                                                                                                                                                                                                                                                                                                                                                                                                       |
| <b>10 REACTOME METABOLISM OF VITAMINS AND COFACTORS</b>                                                                                                                                                                                                                              | Pank2, Nadsyn1, Aasdhppt, Rfk, Tpk1, Mthfd1, Ppcdc, Flad1, Shmt1, Slc25a16, Cyb5, Gsto2, Slc5a6, Slc25a32, Slc46a1, Nadk, Slc19a1, Coasy, Pank3, Pank1, Acp5, Fasn                                                                                                                                                                                                                                                                                                                                                                                                                                                                                                                                                                                                                                                                                                                                                                                                                                                                                                                                                |

|                                                                                          |                                                                                                                                                                                                                                                                                                                                                                                                                                                                                                                                                                                                                                                                                                                                                                                                                                                                                                                                                                                                                                                                                                                                                                                                                                                                                                                                                                                                                                                                                                                                                                                                                                                                                                  |
|------------------------------------------------------------------------------------------|--------------------------------------------------------------------------------------------------------------------------------------------------------------------------------------------------------------------------------------------------------------------------------------------------------------------------------------------------------------------------------------------------------------------------------------------------------------------------------------------------------------------------------------------------------------------------------------------------------------------------------------------------------------------------------------------------------------------------------------------------------------------------------------------------------------------------------------------------------------------------------------------------------------------------------------------------------------------------------------------------------------------------------------------------------------------------------------------------------------------------------------------------------------------------------------------------------------------------------------------------------------------------------------------------------------------------------------------------------------------------------------------------------------------------------------------------------------------------------------------------------------------------------------------------------------------------------------------------------------------------------------------------------------------------------------------------|
| <b>11 KEGG PYRUVATE METABOLISM</b><br>7 KEGG PROPANOATE METABOLISM                       | Acat3, Haghl, <sup>1</sup> Ldha, Hagh, Dlat, Acat1, Acyp1, Pdha1, Pdhb, Dld, Pkm2, Grhpr, Ldhd, Aldh2, Aldh9a1, <sup>7</sup> Acacb, Me1, Pcx, <sup>7</sup> Acss2, <sup>7</sup> Acaca, Pck1, Acat2                                                                                                                                                                                                                                                                                                                                                                                                                                                                                                                                                                                                                                                                                                                                                                                                                                                                                                                                                                                                                                                                                                                                                                                                                                                                                                                                                                                                                                                                                                |
| <b>13 KEGG GLYCEROLIPID METABOLISM</b>                                                   | Agpat9, Dgkb, Gyk, Agk, Agpat6, Agpat1, Gpam, Aldh2, Agpat3, Aldh9a1, Dgat2, Dgat1, Pnpla3, Agpat2, Mgl                                                                                                                                                                                                                                                                                                                                                                                                                                                                                                                                                                                                                                                                                                                                                                                                                                                                                                                                                                                                                                                                                                                                                                                                                                                                                                                                                                                                                                                                                                                                                                                          |
| <b>15 LIPID CATABOLIC PROCESS</b><br>24 CELLULAR LIPID CATABOLIC PROCESS                 | <sup>24</sup> Smpd3, <sup>24</sup> Prdx6, <sup>24</sup> Aldh5a1, <sup>24</sup> Ech1, <sup>24</sup> Cyp46a1, <sup>24</sup> Pla2g4c, Angptl3, <sup>24</sup> Echs1, <sup>24</sup> Acadm, <sup>24</sup> Acads, <sup>24</sup> Ppara, <sup>24</sup> Acadvl, <sup>24</sup> Hacl1, <sup>24</sup> Pnpla3, Cidea                                                                                                                                                                                                                                                                                                                                                                                                                                                                                                                                                                                                                                                                                                                                                                                                                                                                                                                                                                                                                                                                                                                                                                                                                                                                                                                                                                                           |
| <b>16 MITOCHONDRION LUMEN</b><br>17 MITOCHONDRIAL MATRIX<br>7 KEGG PROPANOATE METABOLISM | Timm8b, Spg7, Preld1, Trnt1, Polrmt, Car5a, Tomm22, Immt, Asah2, Caprin2, Hscb, Fdxr, Casp7, Dguok, Tmem186, Opa1, Ccdc39, Slc9a6, Cpt1b, Abcb6, Sdhd, Dnajc19, Atp5d, Ndufa1, Cisd1, Sco1, Gpx4, Fdx1, Tsfm, Hint2, Mrpl32, Mtx2, Supv31l, Fh1, Gcdh, Hsd3b1, Uqcrc1, Cox15, Cln3, Agpat5, Napg, <sup>14,17</sup> Polg2, Sod2, Tbrg4, <sup>14,17</sup> Mrpl40, <sup>14,17</sup> Timm44, Ndufb6, <sup>14,17</sup> Mrps24, Hspe1, Hspd1, Phb2, Cyc1, Sdhd, Mthfd1, Hsd17b10, Mtrf1, Peci, Afg3l2, Ndufs4, Mrps31, Glrx2, <sup>14,17</sup> Mrps15, Surf1, Aldh5a1, Amacr, <sup>14,17</sup> Cs, Idh3b, Slc25a15, Coq4, <sup>14,17</sup> Etfa, Ppox, <sup>14,17</sup> Mrps35, <sup>14,17</sup> Mrps18a, Pet112l, Ndufs3, <sup>14,17</sup> Etfb, Maob, D2hgdh, Ndufs8, Clpx, <sup>14,17</sup> Mrps11, <sup>14,17</sup> Dnaja3, Cox4nb, Slc22a4, Hspa9, Acat1, Tufm, Sdha, Oxsm, Sod1, Timm9, Pdha1, <sup>14,17</sup> Mrps22, Htra2, Mcat, <sup>14,17</sup> Nr3c1, Echs1, <sup>14,17</sup> Bckdk, Mosc2, Foxred1, Timm50, Ecsit, Cox11, Acn9, Mtif3, Thg1l, Ndufs5, Bcs1l, Casp8, Bcat2, Ptges2, Alas2, Glud1, <sup>14,17</sup> Acadm, Dld, Smcr7l, <sup>14,17</sup> Aldh4a1, Acp6, Mtif2, Acadsb, Aco2, Tfam, Abcb8, Tmem143, Ghitm, Aifm1, Aass, Glrx5, Mut, Decr1, Lonp1, Triap1, <sup>7</sup> Sucla2, Hadh, Bphl, Phb, Slc25a22, <sup>14,17</sup> Mrpl10, <sup>7</sup> Suclg1, Sars2, Bnip3l, Iscu, <sup>14,17</sup> Bckdhd, Txnrd2, Acads, Ak3, Gcsh, Cox18, <sup>14,17</sup> Grpel1, Ldhd, Pts, Acadvl, <sup>14,17</sup> Mrps21, Dhrr4, <sup>14,17</sup> Bckdha, Pccb, <sup>14,17</sup> Gm4459, Ucp3, Coq6, Pdk4, <sup>14,17</sup> Dbt, Aifm2, Gstz1, Letm1, Car5b, Nipsnap1, Mecr, Pcx, Slc25a1 |
| <b>18 REACTOME BRANCHED CHAIN AMINO ACID CATABOLISM</b>                                  | Auh, Hsd17b10, Acat1, Hibadh, Bcat2, Dld, Mccc1, Acad8, Acadsb, Bckdhd, Mccc2, Aldh6a1, Hibch, Bckdha, Dbt                                                                                                                                                                                                                                                                                                                                                                                                                                                                                                                                                                                                                                                                                                                                                                                                                                                                                                                                                                                                                                                                                                                                                                                                                                                                                                                                                                                                                                                                                                                                                                                       |
| <b>19 COFACTOR METABOLIC PROCESS</b>                                                     | Sdhd, Mocos, Fech, Acot3, Cox15, Gclc, Blvra, Gclm, Sdhd, Pdss2, Glrx2, Ppox, Alas1, Sdha, Oxsm, Sod1, Pgl, Acot4, Pdhd, Alas2, Aco2, Gpx1, Tspo, Alad, Mlycd, Iscu, Mocs2, Coasy Aldh11l, Me1, Pgd, Acly                                                                                                                                                                                                                                                                                                                                                                                                                                                                                                                                                                                                                                                                                                                                                                                                                                                                                                                                                                                                                                                                                                                                                                                                                                                                                                                                                                                                                                                                                        |
| <b>21 KEGG BIOSYNTHESIS OF UNSATURATED FATTY ACIDS</b>                                   | Acot4, Hadha, Acox3, Acox1, Pecr, Elovl5, Hsd17b12, Scd1, Ptplb, Elovl6                                                                                                                                                                                                                                                                                                                                                                                                                                                                                                                                                                                                                                                                                                                                                                                                                                                                                                                                                                                                                                                                                                                                                                                                                                                                                                                                                                                                                                                                                                                                                                                                                          |
| <b>25 VITAMIN METABOLIC PROCESS</b>                                                      | Pgl, Rxra, Dhrr3, Retsat, Dhrr9, Me1, Pgd                                                                                                                                                                                                                                                                                                                                                                                                                                                                                                                                                                                                                                                                                                                                                                                                                                                                                                                                                                                                                                                                                                                                                                                                                                                                                                                                                                                                                                                                                                                                                                                                                                                        |

The top 25 *C. pneumoniae* gene sets whose member genes are predominantly upregulated with respect to the chronic control group. Column 1 includes the gene set name (bold) as provided by MSigDB and the rank of the gene set based on Normalized Enrichment Score (NES). Gene set names that are not in bold are gene sets that are redundant or partially redundant and included within larger bolded gene sets. The NES ranged from 2.64 (for Microbody Peroxisome, the top ranked gene set) to 2.03 (Vitamin Metabolic Process, the 25<sup>th</sup>-ranked gene set). FDR  $q$  range: 0-0.001. Column 2 includes those genes within the gene set that significantly contributed to the enrichment of the gene set. Genes within redundant gene sets are preceded by corresponding superscripts for the gene set to which they belong.

**Supplemental Table 5 - Gene Set Enrichment Analysis.** Negative enrichment: chronic C. pneumoniae-treated group vs. chronic control group

| <b>Gene Set</b>                                                                                                                      | <b>Genes Contributing to Core Enrichment</b>                                                                                                                                                                                                                                                                                                                                                                                                                                                                                                         |
|--------------------------------------------------------------------------------------------------------------------------------------|------------------------------------------------------------------------------------------------------------------------------------------------------------------------------------------------------------------------------------------------------------------------------------------------------------------------------------------------------------------------------------------------------------------------------------------------------------------------------------------------------------------------------------------------------|
| <b>1 KEGG HYPERTROPHIC CARDIOMYOPATHY</b>                                                                                            | Cacna1d, Itga5, Itgb8, Tgfb1, Prkag3, Itga2, Cacna2d1, Sgcb, Cacnb2, Lama2, Prkaa2, Sgcg, Itgb6, Sgca, Slc8a1, Cacna1c, Atp2a2, Ryr2, Cacna2d2, Des, Actc1, Myh7, Tnni3, Myh6, Myl2, Myl3, Tnnc1, Ttn, Mybpc3, Tnnt2                                                                                                                                                                                                                                                                                                                                 |
| <b>2 KEGG DILATED CARDIOMYOPATHY</b>                                                                                                 | Prkx, Itga2, Cacna2d1, Sgcb, Cacnb2, Lama2, Sgcg, Itgb6, Sgca, Slc8a1, Cacna1c, Atp2a2, Ryr2, Cacna2d2, Des, Actc1, Myh7, Tnni3, Myh6, Myl2, Myl3, Tnnc1, Ttn, Mybpc3, Tnnt2                                                                                                                                                                                                                                                                                                                                                                         |
| <b>3 REACTOME MUSCLE CONTRACTION</b><br>4 REACTOME STRIATED MUSCLE CONTRACTION                                                       | <sup>4</sup> Mybpc2, 2900073G15Rik, <sup>4</sup> Ttn, <sup>4</sup> Tnnt2, <sup>4</sup> Tnni3, <sup>4</sup> Tnni1, <sup>4</sup> Tnnc1, <sup>4</sup> Tmod1, <sup>4</sup> Tcap, Sorbs1, <sup>4</sup> Neb, <sup>4</sup> Myl2, <sup>4</sup> Myl3, <sup>4</sup> Myl4, <sup>4</sup> Myh6, <sup>4</sup> Mybpc3, <sup>4</sup> Des, <sup>4</sup> Actn2                                                                                                                                                                                                         |
| <b>5 MUSCLE DEVELOPMENT</b><br>21 SKELETAL MUSCLE DEVELOPMENT                                                                        | Gaa, Tgfb1, Hbegf, <sup>21</sup> Svil, <sup>21</sup> Notch1, Sgcb, <sup>21</sup> Tbx3, Ache, Mstn, <sup>21</sup> Nrd1, <sup>21</sup> Cacnb2, Lama2, Sgcg, Sgca, <sup>21</sup> Mapk12, <sup>21</sup> Igfbp3, <sup>21</sup> Cacna1h, Itgb1bp2, <sup>21</sup> Acta1, Myh7, Tnni3, Myh6, <sup>21</sup> Ttn, Mybpc3, <sup>21</sup> Csrp3                                                                                                                                                                                                                  |
| <b>6 ACTIN CYTOSKELETON</b>                                                                                                          | Fscn1, Gsn, Ablim1, Sep11, Capg, Pdlim5, Spna1, Amot, Sorbs1, Neb, Clic5, Dynll2, Myom1, 2900073G15Rik, Ablim2, Spnb1, Myo18b, Palld, Acta1, Myl4, Abra, Actc1, Myh7, Tnni3, Myh6, Myl3, Tnnc1, Actn2, Tnnt2, Myot                                                                                                                                                                                                                                                                                                                                   |
| <b>8 STRUCTURAL MOLECULE ACTIVITY</b><br>7 STRUCTURAL CONSTITUENT OF MUSCLE                                                          | Fbn2, Actl7b, Mybpc1, Strn4, Mtap7, Mtap4, Plp1, Mal, Epb4.114b, Spna1, Lama2, Lad1, <sup>7</sup> Neb, Fbln2, <sup>7</sup> Myom1, Comp, Chi3l1, <sup>7</sup> 2900073G15Rik, Fbln1, Dsp, Myoc, <sup>7</sup> Tcap, <sup>7</sup> Mybpc2, Acta1, Des, <sup>7</sup> Actc1, <sup>7</sup> Myh7, <sup>7</sup> Myom2, <sup>7</sup> Myh6, <sup>7</sup> Myl2, <sup>7</sup> Myl3, <sup>7</sup> Ttn, <sup>7</sup> Actn2, <sup>7</sup> Mybpc3, <sup>7</sup> Myot                                                                                                   |
| <b>9 REGULATION OF MULTICELLULAR ORGANISMAL PROCESS</b><br>12 REGULATION OF HEART CONTRACTION<br>25 REGULATION OF MUSCLE CONTRACTION | Grik2, <sup>12</sup> Kcnj12, <sup>25</sup> Sphk1, Tlr8, Icosl, <sup>25</sup> 2900073G15Rik, <sup>12</sup> Kcnq1, <sup>12</sup> Kcne1, <sup>12</sup> Scn5a, <sup>25</sup> Ppp1r12b, Ptgds, <sup>12</sup> Cacna1h, <sup>12</sup> Ryr2, <sup>12</sup> Hspb7, <sup>12</sup> Kcng2, <sup>12</sup> Chrm2, Ahsg, <sup>12</sup> Des, <sup>12</sup> Actc1, <sup>12</sup> Myh7, <sup>12</sup> Myh6, <sup>25</sup> Myl2, <sup>25</sup> Tnnc1, <sup>25</sup> Mybpc3, <sup>12</sup> Tnnt2                                                                         |
| <b>10 KEGG CARDIAC MUSCLE CONTRACTION</b>                                                                                            | Slc8a1, Cacna1c, Atp1a1, Atp2a2, Ryr2, Cacna2d2, Atp1b1, Actc1, Myh7, Tnni3, Myh6, Myl2, Myl3, Tnnc1, Cox6a2, Tnnt2                                                                                                                                                                                                                                                                                                                                                                                                                                  |
| <b>11 CYTOSKELETAL PROTEIN BINDING</b><br>23 ACTIN BINDING                                                                           | Myo9b, Tnnt1, Spnb2, Prnp, Ccr5, Rab11fip5, Apoe, Ezr, Kif5b, Mybpc1, Arfgef1, Baiap2, <sup>23</sup> Svil, <sup>23</sup> Ablim1, Ctnna1, Pacsin3, <sup>23</sup> Egfr, <sup>23</sup> Pdlim5, Tmod4, <sup>23</sup> Shroom3, <sup>23</sup> Spna1, <sup>23</sup> Ssh2, Jup, <sup>23</sup> Sorbs1, <sup>23</sup> Scin, <sup>23</sup> Fxyd5, Clip1, <sup>23</sup> Nexn, Clasp1, <sup>23</sup> Twf2, <sup>23</sup> Spnb1, Trim63, Palld, Acta1, <sup>23</sup> Abra, <sup>23</sup> Tnni3, <sup>23</sup> Nrap, Tnnc1, Ttn, Actn2, Mybpc3, <sup>23</sup> Tnnt2 |
| <b>13 KEGG ARRHYTHMOGENIC RIGHT VENTRICULAR CARDIOMYOPATHY ARVC</b>                                                                  | Cacna1d, Itga5, Itgb8, Itga2, Cacna2d1, Sgcb, Ctnna1, Ctnna3, Cacnb2, Lama2, Jup, Dsc2, Sgcg, Itgb6, Dsg2, Sgca, Slc8a1, Cacna1c, Dsp, Atp2a2, Pkp2, Ryr2, Cacna2d2, Cdh2, Des, Actn2                                                                                                                                                                                                                                                                                                                                                                |
| <b>14 CONTRACTILE FIBER</b><br><b>15 CONTRACTILE FIBER PART</b><br>19 MYOFIBRIL                                                      | <sup>19</sup> Neb, <sup>19</sup> Myom1, 2900073G15Rik, <sup>19</sup> Acta1, <sup>19</sup> Abra, <sup>19</sup> Des, <sup>19</sup> Myoz2, <sup>19</sup> Tnni3, Myl3, <sup>19</sup> Tnnc1, <sup>19</sup> Ttn, <sup>19</sup> Tnnt2                                                                                                                                                                                                                                                                                                                       |



|                                                                                                                   |                                                                                                                                                                                                                                                                                                                                                                                                                                                                                                                                                                                                                                                                                                                                           |
|-------------------------------------------------------------------------------------------------------------------|-------------------------------------------------------------------------------------------------------------------------------------------------------------------------------------------------------------------------------------------------------------------------------------------------------------------------------------------------------------------------------------------------------------------------------------------------------------------------------------------------------------------------------------------------------------------------------------------------------------------------------------------------------------------------------------------------------------------------------------------|
| <b>16 HEART DEVELOPMENT</b>                                                                                       | Irx4, Fgf12, Gata4, Tbx5, Hand2, Alpk3, Casq2, Myh7, Myh6, Mybpc3                                                                                                                                                                                                                                                                                                                                                                                                                                                                                                                                                                                                                                                                         |
| <b>20 GATED CHANNEL ACTIVITY</b><br>17 VOLTAGE GATED CHANNEL ACTIVITY<br>18 VOLTAGE GATED CATION CHANNEL ACTIVITY | Trpc4, Kcnmb4, Chrb4, <sup>17,18</sup> Kcnd3, <sup>17,18</sup> Cacna1d, Htr3a, <sup>17,18</sup> Kcnk1, <sup>17,18</sup> Kcnk6, Nmur2, <sup>17,18</sup> Kcnh2, <sup>17,18</sup> Kcnb2, Clcn1, <sup>17,18</sup> Kcnj10, <sup>17,18</sup> Kcna5, <sup>17,18</sup> Cacna2d1, Trpc3, Chrna3, <sup>17,18</sup> Kcna6, <sup>17,18</sup> Scn4b, <sup>17,18</sup> Kcna1, <sup>17,18</sup> Scn7a, <sup>17,18</sup> Cacnb2, <sup>17,18</sup> Kcnj12, <sup>17,18</sup> Kcna4, <sup>17,18</sup> Scn4a, Ryr3, <sup>17,18</sup> Kcnq1, <sup>17,18</sup> Kcne1, Kcnn2, <sup>17,18</sup> Cacna1c, <sup>17,18</sup> Scn5a, <sup>17,18</sup> Cacna1g, <sup>17,18</sup> Kcnj5, <sup>17,18</sup> Cacna1h, <sup>17,18</sup> Kcnj3, Ryr2, <sup>17,18</sup> Kcng2 |
| <b>22 CATION CHANNEL ACTIVITY</b>                                                                                 | Kcns1, Trpv5, Trpc4, Kcnmb4, Chrb4, Kcnd3, Cacna1d, Htr3a, Kcnk1, Kcnk6, Kcnh2, Kcnb2, Kcnj10, Kcna5, Cacna2d1, Trpc3, Chrna3, Kcna6, Scn4b, Kcna1, Scn7a, Cacnb2, Kcnj12, Kcna4, Scn4a, Ryr3, Kcnq1, Kcne1, Kcnn2, Cacna1c, Scn5a, Cacna1g, Kcnj5, Cacna1h, Kcnj3, Ryr2, Kcng2                                                                                                                                                                                                                                                                                                                                                                                                                                                           |
| <b>24 CYTOSKELETAL PART</b>                                                                                       | Nek2, Klc1, Myo9b, Gas2, Spnb2, Cenpf, Nefl, Dnaic2, Nedd9, Shroom4, Ezr, Kif5b, Mtap7, Kifc3, Mtap4, Sept11, Capg, Spna1, Amot, Drd2, Narf, Sorbs1, Dynll2, Clip1, Myom1, 2900073G15Rik, Cacna1c, Clasp1, Spnb1, Myo18b, Palld, Acta1, Myl4, Actc1, Myh7, Tnni3, Myh6, Myl3, Tnnc1, Actn2, Tnnt2                                                                                                                                                                                                                                                                                                                                                                                                                                         |

The top 25 *C. pneumoniae* gene sets whose member genes are predominantly downregulated with respect to the chronic control group. Column 1 includes the gene set name (bold) as provided by MSigDB and the rank of the gene set based on Normalized Enrichment Score (NES). Gene set names that are not in bold are gene sets that are redundant or partially redundant and included within larger bolded gene sets. The NES ranged from -2.79 (for KEGG Hypertrophic Cardiomyopathy, the top ranked gene set) to -2.23 (Regulation of Muscle Contraction, the 25<sup>th</sup>-ranked gene set). FDR  $q < 1 \times 10^{-30}$ . Column 2 includes those genes within the gene set that significantly contributed to the enrichment of the gene set. Genes within redundant gene sets are preceded by corresponding superscripts for the gene set to which they belong.

**Supplemental Table 6 - Gene Set Enrichment Analysis.** Positive enrichment: Western diet group vs. chronic control group

| Gene Set                                                                                                                                   | Genes Contributing to Core Enrichment                                                                                                                                                                                                                                                                                                                                                                                                                                                                                                                                                                                                                                                                                                                                                                                                                                                                                                                                                                                                                                                                                                                                                                                                                                                                                                                                                                                                                                                                                                                                                                                                                                                                                                                                                                                                                                                                                          |
|--------------------------------------------------------------------------------------------------------------------------------------------|--------------------------------------------------------------------------------------------------------------------------------------------------------------------------------------------------------------------------------------------------------------------------------------------------------------------------------------------------------------------------------------------------------------------------------------------------------------------------------------------------------------------------------------------------------------------------------------------------------------------------------------------------------------------------------------------------------------------------------------------------------------------------------------------------------------------------------------------------------------------------------------------------------------------------------------------------------------------------------------------------------------------------------------------------------------------------------------------------------------------------------------------------------------------------------------------------------------------------------------------------------------------------------------------------------------------------------------------------------------------------------------------------------------------------------------------------------------------------------------------------------------------------------------------------------------------------------------------------------------------------------------------------------------------------------------------------------------------------------------------------------------------------------------------------------------------------------------------------------------------------------------------------------------------------------|
| <b>1 KEGG LYSOSOME</b>                                                                                                                     | Arse, Ap3s2, Sumf1, Mcoln1, Ap1g1, Scarb2, Galns, Lamp1, Ap3b1, Nagpa, Gaa, Atp6v0b, Atp6v0a2, M6pr, Ctns, Naglu, Atp6v1h, Atp6ap1, Hgsnat, Naga, Ppt1, Ap1s2, Ap3m2, Ctsw, Cd63, Atp6v0a1, Tpp1, Atp6v0d1, Aga, Npc1, Gm2a, Lamp2, Ap1b1, Gba, Ap1s1, Slc17a5, Clta, Gnptab, Gns, Neu1, Ctsa, Acp2, Fuca1, Pla2g15, Psap, Ctsh, Igf2r, Acp5, Tcirg1, Asah1, Ctsk, Hexa, Cln3, Glb1, Hexb, Dnase2a, Manba, Ctsl, Man2b1, Ctso, Ctsb, Gla, Ctsd, Ctsc, Ctsz, Lgmn, Cln5, Galc, Slc11a1, Lipa, Npc2, Gusb, Atp6v0d2, Laptm5, Cd68, Ctss                                                                                                                                                                                                                                                                                                                                                                                                                                                                                                                                                                                                                                                                                                                                                                                                                                                                                                                                                                                                                                                                                                                                                                                                                                                                                                                                                                                          |
| <b>2 REACTOME SIGNALING IN IMMUNE SYSTEM</b><br>10 REACTOME INNATE IMMUNITY SIGNALING<br>24 CELL SURFACE INTERACTIONS AT THE VASCULAR WALL | C920025E04Rik, <sup>10</sup> Nfkbib, Ppp2r5c, Map3k8, Angpt2, <sup>10</sup> Map2k4, Fyn, <sup>10</sup> Map2k6, Csk, Gas6, <sup>10</sup> Mapk14, <sup>10</sup> Ticam2, <sup>10</sup> Tlr6, <sup>10</sup> Ikbkg, <sup>10</sup> Ripk3, <sup>10</sup> Ikbke, <sup>10</sup> Mapkapk3, Itk, Jam2, Atp1b3, <sup>10</sup> Rps6ka2, <sup>10</sup> Tlr4, H2-Ob, Icosl, <sup>10</sup> Dusp7, Cd40, <sup>24</sup> Esam, Icam2, <sup>10</sup> Map3k1, B2m, <sup>24</sup> Cd244, <sup>24</sup> F11r, <sup>10</sup> Rps6ka3, <sup>24</sup> Fn1, <sup>24</sup> Slc3a2, Cd28, Cd34, Cd3e, <sup>10</sup> Map2k1, Icam1, <sup>24</sup> Kras, <sup>24</sup> Lck, <sup>24</sup> Itgal, Cd274, <sup>10</sup> Myd88, <sup>24</sup> Nras, <sup>24</sup> Slc7a8, <sup>10</sup> C2, Cd200r1, <sup>24</sup> Slc16a3, Pak1, Ripk2, Grap2, <sup>24</sup> Slc7a7, <sup>10</sup> Mapk3, <sup>24</sup> Pf4, <sup>10</sup> Irak4, Tnfrsf14, H2-M3, <sup>24</sup> Pecam1, <sup>24</sup> Itga6, Cd8b1, <sup>24</sup> Ptpn6, <sup>10</sup> Irak3, <sup>24</sup> Cd47, <sup>24</sup> Olr1, <sup>24</sup> Pros1, Cd3g, <sup>10</sup> Tlr9, <sup>10</sup> Tlr2, <sup>24</sup> Tek, <sup>24</sup> Slc7a11, <sup>10</sup> Dusp6, <sup>10</sup> Irf7, <sup>10</sup> Tlr3, Was, <sup>10</sup> Rps6ka1, Cd4, <sup>10</sup> Ly96, Evi, Fyb, Cd86, <sup>24</sup> Lyn, <sup>10</sup> Tlr7, <sup>24</sup> Itgax, H2-Eb1, <sup>24</sup> Selp, <sup>24</sup> Itgam, <sup>24</sup> Fcer1g, Lcp2, <sup>10</sup> Tlr1, <sup>24</sup> Sirpa, Cd80, Fcgr2b, H2-Aa, <sup>10</sup> Cd180, Tyrobp, <sup>10</sup> Tlr8, Fcgr4, <sup>10</sup> C1ra, <sup>24</sup> Inpp5d, <sup>10</sup> Lbp, H2-DMA, <sup>10</sup> C1qc, <sup>10</sup> C1qa, <sup>10</sup> C3, <sup>24</sup> Cd84, <sup>10</sup> C1qb, Vcam1, Vav1, <sup>10</sup> Ly86, <sup>10</sup> Cfb, <sup>10</sup> Cd14, <sup>24</sup> Cd48, <sup>24</sup> Itga4, <sup>24</sup> Itgb2, Ptprc, <sup>24</sup> Selplg, <sup>10</sup> C6 |
| <b>3 KEGG NATURAL KILLER CELL MEDIATED CYTOTOXICITY</b>                                                                                    | Grb2, Klrk1, Vav2, Gm10499, Bid, Nfatc3, Vav3, Fyn, Ppp3cc, Nfatc1, Tnf, Pik3r3, Icam2, Ppp3r1, Ifnar1, Cd244, Tnfsf10, Ppp3ca, Map2k1, Icam1, Kras, Lck, Itgal, Nras, Pak1, Mapk3, H2-M3, Pik3cd, Ptpn6, Ifngr1, Ifnar2, Sh2d1b1, Sh3bp2, Pik3cg, Pik3r5, Fcer1g, Prkcb, Lcp2, 2010110P09Rik, Rac2, Tyrobp, Fcgr4, Sykb, Plcg2, H2-T23, Vav1, Cd48, Ptk2b, Itgb2                                                                                                                                                                                                                                                                                                                                                                                                                                                                                                                                                                                                                                                                                                                                                                                                                                                                                                                                                                                                                                                                                                                                                                                                                                                                                                                                                                                                                                                                                                                                                              |
| <b>4 KEGG SYSTEMIC LUPUS ERYTHEMATOSUS</b>                                                                                                 | Hist1h2bn, Tnf, H2-Ob, Cd40, Hist2h2ab, Cd28, Hist3h2a, C2, Hist2h2ac, Grin2a, Hist1h2bm, Hist1h2bg, H2afz, Hist1h2bb, Fcgr1, Cd86, Hist2h2bb, H2-Eb1, Cd80, Fcgr2b, H2-Aa, Fcgr4, Fcgr3, C1ra, H2-DMA, C1qc, C1qa, C3, C1qb, Hist1h2ak, C6                                                                                                                                                                                                                                                                                                                                                                                                                                                                                                                                                                                                                                                                                                                                                                                                                                                                                                                                                                                                                                                                                                                                                                                                                                                                                                                                                                                                                                                                                                                                                                                                                                                                                    |
| <b>6 KEGG B CELL RECEPTOR SIGNALING PATHWAY</b>                                                                                            | Akt1, Nfkb1, Malt1, Grb2, Vav2, Nfkbib, Nfatc3, Vav3, Ppp3cc, Nfatc1, Cd79b, Ikbkg, Rasgrp3, Pik3r3, Ppp3r1, Ppp3ca, Map2k1, Kras, Nras, Dapp1, Mapk3, Btk, Pik3cd, Ptpn6, Nfkbie, Cd22, Cd72, Lyn, Pik3cg, Blnk, Pik3r5, Prkcb, 2010110P09Rik, Fcgr2b, Rac2, Pik3ap1, Sykb, Inpp5d, Plcg2, Vav1                                                                                                                                                                                                                                                                                                                                                                                                                                                                                                                                                                                                                                                                                                                                                                                                                                                                                                                                                                                                                                                                                                                                                                                                                                                                                                                                                                                                                                                                                                                                                                                                                               |
| <b>7 LEISHMANIA INFECTION</b>                                                                                                              | Nos2, Nfkbib, Mapk14, Jak2, Tlr4, Tnf, H2-Ob, Il1a, Myd88, Jak1, Mapk3, Irak4, Ptpn6, Tgfb1, Stat1, Ifngr1, Ncf1, Tlr2, Fcgr1, Cyba, H2-Eb1, Itgam, Ncf4, Prkcb, H2-Aa, Fcgr4, Fcgr3, H2-DMA, C3, Itga4, Itgb2                                                                                                                                                                                                                                                                                                                                                                                                                                                                                                                                                                                                                                                                                                                                                                                                                                                                                                                                                                                                                                                                                                                                                                                                                                                                                                                                                                                                                                                                                                                                                                                                                                                                                                                 |
| <b>8 KEGG TOLL LIKE RECEPTOR SIGNALING PATHWAY</b>                                                                                         | Tollip, Map3k8, Map2k4, Map2k6, Mapk14, Ticam2, Tlr6, Ikbkg, Ikbke, Tlr4, Tnf, Cd40, Pik3r3, Ifnar1, Map2k1, Myd88, Mapk3, Irak4, Pik3cd, Stat1, Cxcl10, Ctsk, Ccl5, Ifnar2, Tlr9, Tlr2, Irf7, Tlr3, Ly96, Cd86, Tlr7, Pik3cg, Irf5, Pik3r5, Tlr1, Cd80, Spp1, Tlr8, Lbp, Casp8, Cd14                                                                                                                                                                                                                                                                                                                                                                                                                                                                                                                                                                                                                                                                                                                                                                                                                                                                                                                                                                                                                                                                                                                                                                                                                                                                                                                                                                                                                                                                                                                                                                                                                                          |
| <b>9 IMMUNE SYSTEM PROCESS</b><br>5 IMMUNE RESPONSE                                                                                        | Cd79b, Ccr9, Ikbkg, Nlrc3, Il15, Cebpg, Lig1, Myh9, Cxcl13, Atp6v0a2, Tlr4, Map4k1, Icosl, <sup>5</sup> Mr1, <sup>5</sup> Fth1, <sup>5</sup> Ccl12, Cdk6, <sup>5</sup> Il18bp, <sup>5</sup> Ets1, <sup>5</sup> Ctsw, <sup>5</sup> Il6st, <sup>5</sup> Tcf7, <sup>5</sup> Preli1, <sup>5</sup> Cd28, Acvr1b, Cd34, Cd3e, Lck, Lrmp, <sup>5</sup> Psmb10, <sup>5</sup> Il18, <sup>5</sup> Ifitm2, <sup>5</sup> Cd274, <sup>5</sup> Rsad2, <sup>5</sup> Tapbp, <sup>5</sup> Ciita, <sup>5</sup> C2, <sup>5</sup> Cnr2, <sup>5</sup> Bst2, <sup>5</sup> Gbp2, <sup>5</sup> Ccr2, <sup>5</sup> Ccr1, <sup>5</sup> Il27ra, Pf4, <sup>5</sup> Tnfrsf14, Cklf, <sup>5</sup> Gpr65, <sup>5</sup> Il2ra, <sup>5</sup> Tgfb1, Clec7a, <sup>5</sup> Cxcl12, <sup>5</sup> Sema4d, <sup>5</sup> Ccl5, <sup>5</sup> Dpp4, Cd47, <sup>5</sup> Ifitm3, <sup>5</sup> Il4ra, Prex1, <sup>5</sup> Bnip3l, <sup>5</sup> Ptger4, <sup>5</sup> Il10rb, Hcls1, <sup>5</sup> Nfam1, <sup>5</sup> Cd22, <sup>5</sup> C5ar1, <sup>5</sup> Was, <sup>5</sup> Lat2, Cd4, <sup>5</sup> Ctsc, <sup>5</sup> Fcgr1, <sup>5</sup> Fyb, <sup>5</sup> Cd86, Lyn, <sup>5</sup> Tlr7, <sup>5</sup> Rgs1, <sup>5</sup> Aim2, <sup>5</sup> Irf8, <sup>5</sup> Blnk, <sup>5</sup> Cd74, <sup>5</sup> Ncf4, <sup>5</sup> Lcp2, Sfp1, <sup>5</sup> Fcgr2b, Saa3, <sup>5</sup> Tlr8, <sup>5</sup> Trem2, <sup>5</sup> Fcgr4, Sykb, <sup>5</sup> Arhgdib, <sup>5</sup> Ptafr, <sup>5</sup> Il7r, <sup>5</sup> Igsf6, <sup>5</sup> Ccr5, Dock2, Mafb, <sup>5</sup> Cd83, <sup>5</sup> Cx3cl1, <sup>5</sup> Ctss, <sup>5</sup> Ly86, <sup>5</sup> Bst1, <sup>5</sup> Il2rg, <sup>5</sup> Itgb2, <sup>5</sup> Ptprc, <sup>5</sup> Cxcr4                                                                                                                                                                                                                                        |
| <b>11 REACTOME TOLL RECEPTOR CASCADES</b>                                                                                                  | Ppp2ca, Tirap, Tab2, Ripk1, Mapk9, Nfkb1, Pik3c3, Irak1, Ppp2r1a, Nfkbib, Map2k4, Map2k6, Mapk14, Ticam2, Tlr6, Ikbkg, Ripk3, Ikbke, Mapkapk3, Rps6ka2, Tlr4, Dusp7, Map3k1, Rps6ka3, Map2k1, Myd88, Mapk3, Irak4, Irak3, Tlr9, Tlr2, Dusp6,                                                                                                                                                                                                                                                                                                                                                                                                                                                                                                                                                                                                                                                                                                                                                                                                                                                                                                                                                                                                                                                                                                                                                                                                                                                                                                                                                                                                                                                                                                                                                                                                                                                                                   |

|                                                                                |                                                                                                                                                                                                                                                                                                                                                                                                                                                                                                                                                                                                                                                                                                                                                                                                                                                                                                                                                                                                                                                                                                                                                                                                                         |
|--------------------------------------------------------------------------------|-------------------------------------------------------------------------------------------------------------------------------------------------------------------------------------------------------------------------------------------------------------------------------------------------------------------------------------------------------------------------------------------------------------------------------------------------------------------------------------------------------------------------------------------------------------------------------------------------------------------------------------------------------------------------------------------------------------------------------------------------------------------------------------------------------------------------------------------------------------------------------------------------------------------------------------------------------------------------------------------------------------------------------------------------------------------------------------------------------------------------------------------------------------------------------------------------------------------------|
|                                                                                | Irf7, Tlr3, Rps6ka1, Ly96, Tlr7, Tlr1, Cd180, Tlr8, Lbp, Ly86, Cd14                                                                                                                                                                                                                                                                                                                                                                                                                                                                                                                                                                                                                                                                                                                                                                                                                                                                                                                                                                                                                                                                                                                                                     |
| <b>13 REACTOME S PHASE</b><br>15 REACTOME<br>SYNTHESIS OF<br>DNA               | <sup>15</sup> Rpa1, <sup>15</sup> Pma3, <sup>15</sup> Psm2, <sup>15</sup> Pma2, <sup>15</sup> Psm9, <sup>15</sup> Prim2, <sup>15</sup> Psmc6, <sup>15</sup> Cdc6, <sup>15</sup> Psm1, <sup>15</sup> Psm2, <sup>15</sup> Orc5l, <sup>15</sup> Psm4, Cul1, <sup>15</sup> Psm13, <sup>15</sup> Mcm5, <sup>15</sup> Orc4l, <sup>15</sup> Pma6, <sup>15</sup> Psm6, <sup>15</sup> Rfc5, <sup>15</sup> Mcm3, <sup>15</sup> Psm3, <sup>15</sup> Orc2l, <sup>15</sup> Psm3, <sup>15</sup> Rb1, <sup>15</sup> Orc3l, <sup>15</sup> Pola1, <sup>15</sup> Pma1, Skp1a, <sup>15</sup> Gins1, <sup>15</sup> Rfc1, <sup>15</sup> Psm5, <sup>15</sup> Mcm4, <sup>15</sup> Lig1, Ccnh, <sup>15</sup> Rfc4, <sup>15</sup> Cdt1, <sup>15</sup> Pma4, <sup>15</sup> Pola2, Cdk4, <sup>15</sup> Gins4, <sup>15</sup> Psmf1, <sup>15</sup> Pold4, <sup>15</sup> Pold3, <sup>15</sup> Rfc2, <sup>15</sup> Psm8, <sup>15</sup> Mcm2, <sup>15</sup> Pma7, <sup>15</sup> Psm10, <sup>15</sup> Pole, <sup>15</sup> Psm10, <sup>15</sup> Dna2, <sup>15</sup> Psm14, <sup>15</sup> Rfc3, <sup>15</sup> Psm2, Ccnd1, Ccne2, <sup>15</sup> Rpa3, <sup>15</sup> Psm9, <sup>15</sup> Psm8, <sup>15</sup> Ccna2, <sup>15</sup> Pole2, <sup>15</sup> Mcm7 |
| <b>14 KEGG FC GAMMA R<br/>MEDIATED<br/>PHAGOCYTOSIS</b>                        | Pik3r3, Arpc4, Arf6, Map2k1, Pak1, Mapk3, Arpc3, Pik3cd, Arpc5, Marcks, Ncf1, Was, Arpc1b, Hck, Fcgr1, Lyn, Pik3cg, Pik3r5, Prkcb, Fcgr2b, Rac2, Fcgr4, Sykb, Fcgr3, Inpp5d, Plcg2, Dock2, Vav1, Ptpcr                                                                                                                                                                                                                                                                                                                                                                                                                                                                                                                                                                                                                                                                                                                                                                                                                                                                                                                                                                                                                  |
| <b>16 REACTOME HOST<br/>INTERACTIONS OF<br/>HIV FACTORS</b>                    | Nup37, Psm6, Psmc4, Rac1, Psm12, Psmc1, Kpnb1, Nup210, Arf1, Psm1, Nup155, Nup54, Pma3, Psm2, Pma2, Nupl1, Nup205, Psm9, Psmc6, Aaas, Xpo1, Nup62, Psm1, Psm2, Psm4, Psm13, Pma6, Psm6, Psm3, Ap2s1, Cul5, Npm1, Psm3, Seh1l, Ap1g1, Pacs1, Ran, Fyn, Pma1, Tpr, Skp1a, Psm5, Nup50, Pma4, Ap2m1, Atp6v1h, Ap2b1, Tceb1, Ap1s2, Psmf1, B2m, Psm8, Ap2a2, Cd28, Pma7, Psm10, Lck, Psm10, Ap1b1, Ap1s1, Psm14, Psm2, Cd8b1, Psm9, Psm8, Elmo1, Cd4, Hck, Dock2                                                                                                                                                                                                                                                                                                                                                                                                                                                                                                                                                                                                                                                                                                                                                            |
| <b>17 REACTOME M G1<br/>TRANSITION</b><br>12 DNA REPLICATION<br>PRE INITIATION | Psm1, Psmc2, Psm7, Pma5, Psm6, Psmc4, Psm12, Psmc1, <sup>12</sup> Mcm6, <sup>12</sup> Psm1, <sup>12</sup> Pma3, <sup>12</sup> Psm2, <sup>12</sup> Pma2, <sup>12</sup> Psm9, <sup>12</sup> Psmc6, <sup>12</sup> Cdc6, <sup>12</sup> Psm1, <sup>12</sup> Psm2, <sup>12</sup> Orc5l, <sup>12</sup> Psm4, <sup>12</sup> Psm13, <sup>12</sup> Mcm5, <sup>12</sup> Orc4l, <sup>12</sup> Pma6, <sup>12</sup> E2f3, <sup>12</sup> Psm6, <sup>12</sup> Mcm3, <sup>12</sup> Psm3, <sup>12</sup> Orc2l, <sup>12</sup> Psm3, <sup>12</sup> Orc3l, <sup>12</sup> Pma1, <sup>12</sup> E2f1, <sup>12</sup> Psm5, <sup>12</sup> E2f2, <sup>12</sup> Mcm4, <sup>12</sup> Cdt1, <sup>12</sup> Pma4, <sup>12</sup> Psmf1, <sup>12</sup> Psm8, <sup>12</sup> Mcm2, <sup>12</sup> Pma7, <sup>12</sup> Psm10, <sup>12</sup> Psm10, <sup>12</sup> Psm14, <sup>12</sup> Psm2, <sup>12</sup> Psm9, <sup>12</sup> Psm8, <sup>12</sup> Mcm7                                                                                                                                                                                                                                                                                                        |
| <b>18 KEGG T CELL<br/>RECEPTOR<br/>SIGNALING<br/>PATHWAY</b>                   | Mapk9, Akt1, Nfkb1, Malt1, Cbl, Grb2, Vav2, Nck1, Nfkbib, Map3k8, Nfatc3, Vav3, Fyn, Ppp3cc, Nfatc1, Mapk14, Ikbkg, Itk, Tnf, Cdk4, Pik3r3, Ppp3r1, Cd28, Cd3e, Ppp3ca, Map2k1, Kras, Lck, Nras, Pak1, Grap2, Mapk3, Pik3cd, Cd8b1, Ptpn6, Nfkbie, Cd3g, Tec, Cd4, Pik3cg, Pik3r5, Lcp2, 2010110P09Rik, Rasgrp1, Vav1, Ptpcr                                                                                                                                                                                                                                                                                                                                                                                                                                                                                                                                                                                                                                                                                                                                                                                                                                                                                            |
| <b>19 DEFENSE<br/>RESPONSE</b>                                                 | Cd40, Gata3, Clec1b, Irak2, F11r, Kng2, Hp, Tnfaip6, Nmi, Il1a, Nlr4, Cd5l, Rsad2, Lsp1, C2, Tnfrsf1a, Rnase6, Ripk2, Cbara1, Anxa1, Ccr2, Ccr1, Stab1, Tnip1, H2-M3, Nlrp3, Tgfb1, Sele, Tcigr1, Cxcl10, Ccl5, Ncf1, Bnip3l, Il10rb, C5ar1, Tlr3, Was, Cysltr1, Aif1, Ly96, Nod1, Clec5a, Cx3cr1, Tlr7, Ccl3, Cfp, Blnk, Il1r2, Csf3r, Ccl2, Tyrobp, Tlr8, Aoah, Ptafr, Lbp, Alox5ap, Ccr5, Cd84, Cd83, C3ar1, Cx3cl1, Cd48, Kcnn4, Lgals3bp, Ptpcr, Cxcr4, Pla2g7, Cybb                                                                                                                                                                                                                                                                                                                                                                                                                                                                                                                                                                                                                                                                                                                                               |
| <b>20 KEGG NOD LIKE<br/>RECEPTOR<br/>SIGNALING<br/>PATHWAY</b>                 | Hsp90b1, Nfkbib, Mapk14, Ikbkg, Tnf, Ccl12, Sugt1, Erbb2ip, Xiap, Birc3, Card9, Nlr4, Il18, Card6, Ripk2, Casp1, Mapk3, Ccl7, Nlrp3, Pycard, Ccl5, Nod1, Pstpip1, Ccl2, Tnfaip3, Casp8                                                                                                                                                                                                                                                                                                                                                                                                                                                                                                                                                                                                                                                                                                                                                                                                                                                                                                                                                                                                                                  |
| <b>21 KEGG<br/>HEMATOPOIETIC<br/>CELL LINEAGE</b>                              | Tnf, Cd5, Kit, Cd34, Cd3e, Il1a, Il2ra, Itga6, Cd8b1, Cd44, Il4ra, Cd3g, Cd22, Csf2ra, Cd4, Tfrc, Fcgr1, Cd38, H2-Eb1, Itgam, Csf3r, Anep, Csf1r, Il7r, Cd14, Cd37, Itga4                                                                                                                                                                                                                                                                                                                                                                                                                                                                                                                                                                                                                                                                                                                                                                                                                                                                                                                                                                                                                                               |
| <b>22 REACTOME G1 S<br/>TRANSITION</b><br>12 DNA REPLICATION<br>PRE INITIATION | <sup>12</sup> Rpa1, <sup>12</sup> Pma3, <sup>12</sup> Psm2, <sup>12</sup> Pma2, <sup>12</sup> Psm9, <sup>12</sup> Prim2, <sup>12</sup> Psmc6, Fbxo5, <sup>12</sup> Cdc6, <sup>12</sup> Psm1, <sup>12</sup> Psm2, <sup>12</sup> Orc5l, <sup>12</sup> Psm4, Cul1, <sup>12</sup> Psm13, <sup>12</sup> Mcm5, <sup>12</sup> Orc4l, <sup>12</sup> Pma6, <sup>12</sup> E2f3, <sup>12</sup> Psm6, <sup>12</sup> Mcm3, <sup>12</sup> Psm3, <sup>12</sup> Orc2l, <sup>12</sup> Psm3, Rb1, <sup>12</sup> Orc3l, <sup>12</sup> Pola1, <sup>12</sup> Pma1, Skp1a, <sup>12</sup> E2f1, <sup>12</sup> Psm5, <sup>12</sup> E2f2, <sup>12</sup> Mcm4, Ccnh, <sup>12</sup> Cdt1, <sup>12</sup> Pma4, <sup>12</sup> Pola2, Tys, <sup>12</sup> Psmf1, <sup>12</sup> Psm8, <sup>12</sup> Mcm2, <sup>12</sup> Pma7, <sup>12</sup> Psm10, <sup>12</sup> Pole, <sup>12</sup> Psm10, Tk2, <sup>12</sup> Psm14, <sup>12</sup> Psm2, Ccne2, <sup>12</sup> Rpa3, <sup>12</sup> Psm9, <sup>12</sup> Psm8, Ccna2, <sup>12</sup> Dbf4, <sup>12</sup> Pole2, <sup>12</sup> Mcm7, Cdk1, Rrm2                                                                                                                                                             |
| <b>23 KEGG CHEMOKINE<br/>SIGNALING<br/>PATHWAY</b>                             | Ccr7, Gnb1, Grb2, Ccl22, Stat5b, Vav2, Gnai2, Nfkbib, Vav3, Adrbk1, Stat2, Cxcl5, Csk, Ccr9, Jak2, Ikbkg, Adcy4, Itk, Cxcl13, Jak3, Rap1a, Pik3r3, Cxcr6, Ccl12, Pxn, Gng11, Map2k1, Kras, Prkx, Gnai3, Nras, Pak1, Ccr2, Mapk3, Ccr1, Pf4, Gng2, Pik3cd, Ccl7, Stat1, Cxcl12, Cxcl10, Rap1b, Ccl5, Elmo1, Fgr, Prex1, Ncf1, Was, Hck, Arrb2, Cx3cr1, Arrb1, Lyn, Plcb2, Ccl3, Pik3cg, Pik3r5, Gngt2, Prkcb, Rac2, Ccl2, Cxcl16, Ccr5, Dock2, Cx3cl1, Vav1, Ptk2b, Cxcr4                                                                                                                                                                                                                                                                                                                                                                                                                                                                                                                                                                                                                                                                                                                                                |

|                                           |                                                                                                                                                                                                                                                                                                                                                                                                         |
|-------------------------------------------|---------------------------------------------------------------------------------------------------------------------------------------------------------------------------------------------------------------------------------------------------------------------------------------------------------------------------------------------------------------------------------------------------------|
| <b>25 REACTOME CELL CYCLE CHECKPOINTS</b> | Hus1, Rpa1, Psma3, Psm2, Psma2, Psm9, Psmc6, Cdc6, Ube2d1, Psme1, Psm2, Orc5l, Psm4, Psm13, Cdc16, Mcm5, Anapc4, Orc4l, Psma6, Rad17, Psm6, Rfc5, Mcm3, Cdc27, Psm3, Orc2l, Rfd2, Trp53, Psme3, Orc3l, Psma1, Rad1, Atm, Psm5, Mcm4, Mdm2, Rfc4, Psma4, Psmf1, Rfc2, Psm8, Mcm2, Psma7, Psm10, Chek2, Psm10, Psm14, Rfc3, Psme2, Bub1b, Ccne2, Rpa3, Psm9, Psm8, Mad2l1, Dbf4, Ube2c, Mcm7, Cdk1, Ccnb2 |
|-------------------------------------------|---------------------------------------------------------------------------------------------------------------------------------------------------------------------------------------------------------------------------------------------------------------------------------------------------------------------------------------------------------------------------------------------------------|

The top 25 Western diet gene sets whose member genes are predominantly upregulated with respect to the chronic control group. Column 1 includes the gene set name (bold) as provided by MSigDB and the rank of the gene set based on Normalized Enrichment Score (NES). Gene set names that are not in bold are gene sets that are redundant or partially redundant and included within larger bolded gene sets. The NES ranged from 2.97 (for KEGG Lysosome, the top ranked gene set) to 2.42 (REACTOME Cell Cycle Checkpoints, the 25<sup>th</sup>-ranked gene set). FDR  $q < 1 \times 10^{-30}$ . Column 2 includes those genes within the gene set that significantly contributed to the enrichment of the gene set. Genes within redundant gene sets are preceded by corresponding superscripts for the gene set to which they belong.

**Supplemental Table 7 - Gene Set Enrichment Analysis.** Negative enrichment: Western diet group vs. chronic control group

| Gene Set                                                                                                                                 | Genes Contributing to Core Enrichment                                                                                                                                                                                                                                                                                                                                                                                                                                                                                                                                                                                                                                                                                                                                                                                                                                                                                                                                                                                                                                                                                                                                                                                                                                                                                                                                                                                                                                                                                                                                                                                                                                                                                                                                                                              |
|------------------------------------------------------------------------------------------------------------------------------------------|--------------------------------------------------------------------------------------------------------------------------------------------------------------------------------------------------------------------------------------------------------------------------------------------------------------------------------------------------------------------------------------------------------------------------------------------------------------------------------------------------------------------------------------------------------------------------------------------------------------------------------------------------------------------------------------------------------------------------------------------------------------------------------------------------------------------------------------------------------------------------------------------------------------------------------------------------------------------------------------------------------------------------------------------------------------------------------------------------------------------------------------------------------------------------------------------------------------------------------------------------------------------------------------------------------------------------------------------------------------------------------------------------------------------------------------------------------------------------------------------------------------------------------------------------------------------------------------------------------------------------------------------------------------------------------------------------------------------------------------------------------------------------------------------------------------------|
| <b>1 G PROTEIN COUPLED RECEPTOR ACTIVITY</b><br>6 RHODOPSIN LIKE RECEPTOR ACTIVITY<br>14 PEPTIDE RECEPTOR ACTIVITY                       | <sup>6,14</sup> Mas1, <sup>6,14</sup> Sstr4, <sup>6,14</sup> Grpr, <sup>6</sup> Adra2b, Gpr125, Grm7, <sup>6</sup> Tas2r107, <sup>6</sup> Tas2r121, <sup>6,14</sup> Sstr1, <sup>6,14</sup> Bdkrb2, <sup>6</sup> Adra2a, <sup>6</sup> Adra2c, Lphn3, <sup>6</sup> Tas2r137, Tmem11, <sup>6</sup> Htr5a, <sup>6</sup> Htr1f, <sup>6,14</sup> Sstr2, <sup>6</sup> Tas1r2, Celsr3, <sup>6</sup> Tas2r119, Pth2r, Bai1, <sup>6,14</sup> Oprm1, <sup>6,14</sup> Brs3, <sup>6</sup> Fshr, <sup>6</sup> Gpr139, <sup>6</sup> Chrm1, <sup>6</sup> Tas2r140, <sup>6,14</sup> Hcrtr2, <sup>6</sup> Pdgfrl, <sup>6</sup> Drd4, <sup>6</sup> Tas2r108, <sup>6,14</sup> Mchr1, <sup>6</sup> Htr2a, Gpr143, Grm2, <sup>6</sup> Olf90, Gcgr, <sup>6,14</sup> Tacr2, <sup>6</sup> Tas2r130, <sup>6,14</sup> Oxtr, Grm3, Vipr2, Bai3, Grm5, <sup>6,14</sup> Sstr3, <sup>6,14</sup> Cckbr, <sup>6,14</sup> Mc3r, <sup>6,14</sup> Nmbr, <sup>6,14</sup> Galr3, Gpr123, <sup>6</sup> Mtnr1a, <sup>6,14</sup> Npbwr1, Gpr113, <sup>6,14</sup> Cckar, Gpr124, Gpr115, <sup>6</sup> Htr6, <sup>6,14</sup> Agtr2, <sup>6</sup> Pax8, Grm8, <sup>6,14</sup> Avpr1b, <sup>6</sup> Adra1d, <sup>6</sup> Htr1b, Lancl1, <sup>6</sup> Ghsr, <sup>6</sup> Olf159, <sup>6</sup> Htr1a, Gpr128, <sup>6</sup> Htr1d, <sup>6,14</sup> Tacr1, <sup>6</sup> Tas2r118, <sup>6</sup> Trhr, <sup>6</sup> Mtnr1b, Glp2r, <sup>6</sup> Drd3, Gpr110, <sup>6,14</sup> Mc5r, Gabbr1, <sup>6,14</sup> Mc4r, <sup>6</sup> Tbxa2r, <sup>6</sup> Olf15, <sup>6</sup> Olf410, <sup>6,14</sup> Sstr5, <sup>6</sup> Tas1r3, Ghrhr, <sup>6,14</sup> Oprk1, <sup>6,14</sup> Gpr17, <sup>6</sup> Chrm5, <sup>6,14</sup> Kiss1r, <sup>6</sup> Gnrhr, <sup>6,14</sup> Galr2, <sup>6,14</sup> Nmur2, Lphn1, <sup>6</sup> Drd5, <sup>6,14</sup> F2r13, <sup>6,14</sup> Avpr2 |
| <b>2 APICAL JUNCTION COMPLEX</b><br><b>3 APICOLATERAL PLASMA MEMBRANE</b>                                                                | Cldn8, Cldn14, Cldn11, Cldn10a, Cldn4, Cldn17, Wnk4, Cldn6, Amotl1, Sorbs1, Pard3, Pard6a, Cldn1, Cldn18, Ash1l, Cldn3, Cldn12, Cldn16, Cldn23, Cldn19, Cldn7, Cldn20, Cldn9, Pdzd3, Cldn22                                                                                                                                                                                                                                                                                                                                                                                                                                                                                                                                                                                                                                                                                                                                                                                                                                                                                                                                                                                                                                                                                                                                                                                                                                                                                                                                                                                                                                                                                                                                                                                                                        |
| <b>4 NEUROTRANSMITTER BINDING</b><br>5 NEUROPEPTIDE RECEPTOR ACTIVITY<br>7 NEUROTRANSMITTER RECEPTOR ACTIVITY<br>10 NEUROPEPTIDE BINDING | <sup>7</sup> Gabra2, <sup>7</sup> Chrna7, <sup>7</sup> Gabra6, <sup>7</sup> Gabra4, <sup>7</sup> Nmur1, <sup>7</sup> Chrm4, Mrgprx2, <sup>5,7,10</sup> Galr1, <sup>7</sup> Drd1a, <sup>5,7,10</sup> Tacr3, Adrb2, <sup>7</sup> Chrna6, <sup>5,7,10</sup> Sstr4, <sup>5,7,10</sup> Sstr1, <sup>7</sup> Chrna1, <sup>5,7,10</sup> Sstr2, <sup>7</sup> Chrn4, <sup>5,7,10</sup> Brs3, <sup>7</sup> Gabrg2, <sup>7</sup> Chrm1, <sup>5,7,10</sup> Hcrtr2, <sup>7</sup> Drd4, <sup>5,7,10</sup> Mchr1, <sup>5,7,10</sup> Tacr2, <sup>5,7,10</sup> Sstr3, <sup>5,7,10</sup> Cckbr, <sup>5,7,10</sup> Nmbr, <sup>5,7,10</sup> Galr3, <sup>5,7,10</sup> Cckar, <sup>7</sup> Chrna5, <sup>5,7,10</sup> Tacr1, <sup>7</sup> Drd3, <sup>5,7,10</sup> Sstr5, <sup>7</sup> Chrne, <sup>7</sup> Chrm5, <sup>5,7,10</sup> Kiss1r, <sup>5,7,10</sup> Galr2, <sup>5,7,10</sup> Nmur2, <sup>7</sup> Drd5                                                                                                                                                                                                                                                                                                                                                                                                                                                                                                                                                                                                                                                                                                                                                                                                                                                                                                                             |
| <b>9 KEGG NEUROACTIVE LIGAND RECEPTOR INTERACTION</b>                                                                                    | Gipr, Chrna6, Npy2r, Mas1, Gabrg3, Sstr4, Grpr, Grid2, Taar9, Adra2b, Fshb, Grm7, Rxfp2, Sstr1, P2ry2, Bdkrb2, Adra2a, Adra2c, Gabrb2, Grik1, Grin2d, Ltb4r2, Chrna1, Htr5a, Htr1f, Taar2, Sstr2, Gabrb1, Fpr3, Grid1, Thra, Pth2r, Htr2c, Oprm1, Chrn4, P2ry4, Brs3, Fshr, Gabrg2, Chrm1, Hcrtr2, F2, Gpr50, Lhcg, Drd4, Pard3, Mchr1, Htr2a, Grm2, Chrn3, S1pr4, Taar6, Gpr83, Gcgr, Tacr2, S1pr5, Grin2b, Oxtr, Grm3, P2rx1, Vipr2, Taar5, Grm5, Ntsr2, Sstr3, Gabra1, Thrb, Cckbr, Mc3r, Nmbr, Galr3, Mtnr1a, Npbwr1, Cckar, Gzma, Htr6, Grin2c, Agtr2, Oprl1, Lpar2, Grm8, Avpr1b, Chrna5, Adra1d, Htr1b, Ghsr, Chrnd, Htr1a, Grik4, Grin3b, Gabre, Chrng, Calcrl, Htr1d, Tacr1, Trhr, Mtnr1b, Glp2r, Drd3, Mc5r, Gabrp, Gabbr1, Gria1, Mc4r, Tbxa2r, Grik5, Npffr1, Hrh4, Prss2, Hcrtr1, Sstr5, Ghrhr, Npffr2, Oprk1, Chrne, Prlhr, Npy1r, Chrm5, Kiss1r, Gnrhr, Galr2, Gabrd, Nmbr2, Lhb, Drd5, F2r13, Avpr2, Prl, P2rx5                                                                                                                                                                                                                                                                                                                                                                                                                                                                                                                                                                                                                                                                                                                                                                                                                                                                                    |
| <b>11 REACTOME AMINE LIGAND BINDING RECEPTORS</b><br>24 AMINE RECEPTOR ACTIVITY                                                          | Taar1, <sup>24</sup> Hrh3, <sup>24</sup> Chrm4, <sup>24</sup> Htr7, <sup>24</sup> Adrb1, <sup>24</sup> Adra1a, <sup>24</sup> Drd1a, <sup>24</sup> Hrh2, <sup>24</sup> Adrb2, Taar9, <sup>24</sup> Adra2b, Taar8c, <sup>24</sup> Adra2a, <sup>24</sup> Adra2c, <sup>24</sup> Htr5a, <sup>24</sup> Htr1f, Taar2, Htr2c, <sup>24</sup> Chrm1, <sup>24</sup> Drd4, <sup>24</sup> Htr2a, Taar6, Taar5, <sup>24</sup> Htr6, <sup>24</sup> Adra1d, <sup>24</sup> Htr1b, <sup>24</sup> Htr1a, <sup>24</sup> Htr1d, <sup>24</sup> Drd3, Hrh4, <sup>24</sup> Chrm5, <sup>24</sup> Drd5; (Htr3b – 24 ONLY)                                                                                                                                                                                                                                                                                                                                                                                                                                                                                                                                                                                                                                                                                                                                                                                                                                                                                                                                                                                                                                                                                                                                                                                                                    |
| <b>12 INTERCELLULAR JUNCTION</b><br>8 TIGHT JUNCTION                                                                                     | <sup>8</sup> Cldn8, <sup>8</sup> Cldn14, <sup>8</sup> Cldn11, <sup>8</sup> Cldn10a, Pkp4, <sup>8</sup> Cldn4, <sup>8</sup> Cldn17, Vcl, Gjb1, <sup>8</sup> Wnk4, Dsc1, Bai1, <sup>8</sup> Cldn6, <sup>8</sup> Amotl1, Amtn, Sorbs1, <sup>8</sup> Pard3, Nrap, <sup>8</sup> Pard6a, <sup>8</sup> Cldn, <sup>8</sup> Cldn18, <sup>8</sup> Ash1l, <sup>8</sup> Cldn3, <sup>8</sup> Cldn12, <sup>8</sup> Cldn16, <sup>8</sup> Cldn23, Ctnna3, <sup>8</sup> Cldn19, Gjd3, Pdzd2, <sup>8</sup> Cldn7, <sup>8</sup> Cldn20, <sup>8</sup> Cldn9, Zyx, Pdzd3, <sup>8</sup> Cldn22                                                                                                                                                                                                                                                                                                                                                                                                                                                                                                                                                                                                                                                                                                                                                                                                                                                                                                                                                                                                                                                                                                                                                                                                                                           |
| <b>13 STRUCTURAL CONSTITUENT OF MUSCLE</b>                                                                                               | Actn2, Actc1, Myl6b, 2900073G15Rik, Tcap, Myl6, Mybph, Mybpc3, Myh7, Myot, Asph, Myh11, Myl3, Mylpf, Smtn, Dmd, Tpm2, Myl2, Mybpc1, Mybpc2, Myom1                                                                                                                                                                                                                                                                                                                                                                                                                                                                                                                                                                                                                                                                                                                                                                                                                                                                                                                                                                                                                                                                                                                                                                                                                                                                                                                                                                                                                                                                                                                                                                                                                                                                  |

|                                                                                                                                     |                                                                                                                                                                                                                                                                                                                                                                                                                                                                                                                                                                                                                                                                                                                                                                                                                                                                                                                                                       |
|-------------------------------------------------------------------------------------------------------------------------------------|-------------------------------------------------------------------------------------------------------------------------------------------------------------------------------------------------------------------------------------------------------------------------------------------------------------------------------------------------------------------------------------------------------------------------------------------------------------------------------------------------------------------------------------------------------------------------------------------------------------------------------------------------------------------------------------------------------------------------------------------------------------------------------------------------------------------------------------------------------------------------------------------------------------------------------------------------------|
| <b>15 CALCIUM CHANNEL ACTIVITY</b>                                                                                                  | Cacna1e, Cacng5, Trpc5, Ryr1, Trpc1, Trpv6, Cacnb2, Cacnb1, Cacng1, Trpv5, Trpc4, Cacna1g, Cacng4, Cacna1c                                                                                                                                                                                                                                                                                                                                                                                                                                                                                                                                                                                                                                                                                                                                                                                                                                            |
| <b>16 FEEDING BEHAVIOR</b>                                                                                                          | Htr2c, Brs3, Hcrtr2, Npw, Mchr1, Ppy, Cckbr, Galr3, Cckar, Ghsh, Mc4r, Hcrtr1, Ghrl, Galr2, Nmur2                                                                                                                                                                                                                                                                                                                                                                                                                                                                                                                                                                                                                                                                                                                                                                                                                                                     |
| <b>18 VOLTAGE GATED CHANNEL ACTIVITY</b><br>17 VOLTAGE GATED POTASSIUM CHANNEL ACTIVITY<br>20 VOLTAGE GATED CATION CHANNEL ACTIVITY | <sup>17,20</sup> Kcnh1, <sup>20</sup> Cacnb4, <sup>17,20</sup> Kcnj1, <sup>20</sup> Cacna1a, <sup>17,20</sup> Kcnq2, <sup>17,20</sup> Kcnc3, <sup>20</sup> Cacng2, <sup>17,20</sup> Kcns1, <sup>17,20</sup> Kcnh3, Clcn1, <sup>20</sup> Cacna2d1, <sup>20</sup> Nox1, <sup>17,20</sup> Kcnj12, <sup>17,20</sup> Kcnj6, <sup>17,20</sup> Kcne2, <sup>17,20</sup> Kcnb2, <sup>20</sup> Scn2a1, Clcnka, <sup>20</sup> Cacna1e, <sup>20</sup> Cacng5, <sup>17,20</sup> Kcnj10, <sup>17,20</sup> Kcnk1, <sup>17,20</sup> Kcnc1, <sup>20</sup> Scn11a, <sup>17,20</sup> Kcnq3, <sup>17,20</sup> Kcna5, <sup>20</sup> Cacnb2, <sup>20</sup> Cacnb1, <sup>17,20</sup> Kcns3, <sup>20</sup> Cacng1, Clcn2, <sup>17,20</sup> Kcnq5, <sup>17,20</sup> Kcnc4, <sup>17,20</sup> Kcna1, <sup>17,20</sup> Kcnj14, Clcnkb, <sup>20</sup> Cacna1g, <sup>17,20</sup> Kcna6, <sup>20</sup> Cacng4, <sup>17,20</sup> Kcnd3, <sup>17,20</sup> Kcnh2, <sup>20</sup> Cacna1c |
| <b>19 KEGG BASAL CELL CARCINOMA</b>                                                                                                 | Fzd5, Wnt8b, Fzd2, Tcf7l2, Wnt11, Wnt1, Fzd9, Wnt10a, Fzd3, Wnt6, Wnt7b, Fzd10, Fzd8, Wnt10b, Wnt5a, Shh, Dvl1, Smo, Wnt4, Wnt3a, Wnt8a, Wnt7a, Tcf7l1, Wnt3, Dvl3, Ptch2, Gli1, Gli2, Stk36, Wnt2b, Hhip                                                                                                                                                                                                                                                                                                                                                                                                                                                                                                                                                                                                                                                                                                                                             |
| <b>21 CONTRACTILE FIBER</b>                                                                                                         | Tnni3, Ttn, Tpm3, Tnnt2, Des, Myl6b, 2900073G15Rik, Tnnc1, Vcl, Acta1, Cdk5r1, Svil, Myl3, Mylpf, Dmd, Tpm2, Mybpc1, Abra, Myom1                                                                                                                                                                                                                                                                                                                                                                                                                                                                                                                                                                                                                                                                                                                                                                                                                      |
| <b>22 ANION TRANSMEMBRANE TRANSPORTER ACTIVITY</b>                                                                                  | Slc20a1, Clcn1, Slc34a1, Slc4a2, Best1, Slc34a3, Slc17a2, Slc12a9, Fxyd1, Clca3, Clcnka, Slc5a5, Slc17a4, Abcc2, Slc12a3, Slc4a3, Slc22a8, Slc17a1, Slc12a4, Clcn2, Slc12a1, Abcc5, Slc34a2, Slc26a4, Slc17a3, Bsnd, Slc22a7, Slc13a4, Clcnkb, Nmur2                                                                                                                                                                                                                                                                                                                                                                                                                                                                                                                                                                                                                                                                                                  |
| <b>23 REACTOME TIGHT JUNCTION INTERACTIONS</b>                                                                                      | Cldn8, Cldn14, Cldn11, Cldn10a, Crb3, Cldn4, Cldn17, Cldn6, Pard3, Pard6a, Cldn1, Cldn18, Cldn3, Cldn12, Cldn16, Cldn23, Cldn19, Cldn7, Cldn20, Cldn9, Cldn22                                                                                                                                                                                                                                                                                                                                                                                                                                                                                                                                                                                                                                                                                                                                                                                         |
| <b>25 DIGESTION</b>                                                                                                                 | Galr1, Slc15a1, Apoa4, Pgc, Sstr1, Ctrl, Akr1c21, Sstr2, Mep1b, Akr1d1, Ppy, Tff3, Cckbr, Npc111, Cckar, Tff2, Baat, Sst, Prss2, Galr2, Ppy, Ldlr                                                                                                                                                                                                                                                                                                                                                                                                                                                                                                                                                                                                                                                                                                                                                                                                     |

The top 25 Western diet gene sets whose member genes are predominantly downregulated with respect to the chronic control group. Column 1 includes the gene set name (bold) as provided by MSigDB and the rank of the gene set based on Normalized Enrichment Score (NES). Gene set names that are not in bold are gene sets that are redundant or partially redundant and included within larger bolded gene sets. The NES ranged from -3.43 (for G Protein Coupled Receptor Activity, the top ranked gene set) to -1.92 (Digestion, the 25<sup>th</sup>-ranked gene set). FDR q range: 0 – 0.015. Column 2 includes those genes within the gene set that significantly contributed to the enrichment of the gene set. Genes within redundant gene sets are preceded by corresponding superscripts for the gene set to which they belong.
